1     Body mass index multiple regression formula testable by  
2             all nine Bradford Hill causality criteria: Artificial  
3             intelligence analytics applied to worldwide ecological  
4             BMI and risk factor data to model obesity

5  
6     David K Cundiff, MD (0000-0002-3206-9665), independent researcher,<sup>1 3</sup> Chunyi Wu, PhD  
7     (0000-0002-2186-3433), Research Epidemiologist/Statistician<sup>2 3</sup>

8     <sup>1</sup> Long Beach, California, USA

9     <sup>2</sup> Area Specialist Lead in Epidemiology and Statistics, Michigan Medicine, Ann Arbor,  
10    Michigan, USA

11    <sup>3</sup> Volunteer collaborators with the Institute of Health Metrics and Evaluation, Seattle,  
12    Washington, USA

13    Correspondence to: David K Cundiff [davidkcundiff@gmail.com](mailto:davidkcundiff@gmail.com) Phone: 1-562-438-880

14    Word count: abstract=350, text=2984

15

16

## Key Points

17 **Question:** Can worldwide global burden of disease (GBD) data analysis derive a body mass  
18 index (BMI) multiple regression formula testable by Bradford Hill causality criteria?

19 **Findings:** □ A multiple regression derived formula including population attributable fractions  
20 (PAFs) of 20 dietary risk factors, physical activity, childhood severe underweight, and sex  
21 satisfied all nine Bradford Hill causality criteria. The BMI formula also plausibly predicted the  
22 long-term BMI outcomes related to various dietary and physical activity scenarios.

23 **Meaning:** GBD data analysis of BMI and associated risk factors may infer causality with  
24 overweight/obesity and possibly for health outcomes in nutritional epidemiology generally.

25

## 26 **Abstract**

27 **Importance** Artificial intelligence analytics may be applied to global burden of disease (GBD)

28 data on body mass index (BMI) and associated risk factors.

29 **Objective** Rigorously quantify the interactions of dietary and other risk factors that result in

30 adult BMI

31 **Design** We formatted global burden of disease data relevant to body mass index and associated

32 risk factors. We empirically explored the univariate and multiple regression correlations of BMI

33 risk factors with worldwide BMI to derive a BMI multiple regression formula (BMI formula).

34 **Setting** Worldwide

35 **Participants** Institute of Health Metrics and Evaluation staff and volunteer collaborators

36 analyzed over 12,000 GBD risk factor surveys of people from 195 countries and synthesized the

37 data into representative cohort BMI and risk factor values.

38 **Main outcome measures** the performances of the BMI formula when tested with all nine

39 Bradford Hill causality criteria each scored on a 0-5 scale: 0=negative to 5=very strong support

40 **Results** In the BMI formula derived, all foods were expressed in kilocalories/day (kcal/day). We

41 adjusted BMI formula risk factor coefficients to equate with their population attributable

42 fractions (PAFs in percent's) relating to worldwide mean BMI. BMI increasing foods had “+”

43 signs and BMI decreasing foods had “-“ signs. Total PAF of BMI formula=80.96%. BMI

44 formula=(0.37%\*processed meat + 4.23%\*red meat + 0.02%\*fish + 2.24%\*milk +

45 5.67%\*poultry + 1.77%\*eggs + 0.34%\*alcohol + 0.99%\*sugary beverages + 0.04%\*corn +

46 0.72%\*potatoes + 8.48%\*saturated fatty acids + 3.89%\*polyunsaturated fatty acids +

47 0.27%\*trans fatty acids - 2.99%\*fruit - 4.07%\*vegetables - 0.37%\*nuts and seeds -

48 0.45%\*whole grains - 1.49%\*legumes - 8.62%\*rice - 0.10%\*sweet potatoes - 7.45% physical

49 activity (METs/week) - 20.38%\*child underweight + 6.02%\*sex (male=1, female=2))\*0.05012  
50 + 21.77. (BMI formula versus BMI:  $r=0.907$  (95% CI: 0.903 to 0.911)  $p<0.0001$ , Bradford Hill  
51 causality criteria test scores (0-5): (1) strength=5, (2) experimentation=5, (3) consistency=5, (4)  
52 dose-response=5, (5) temporality=5, (6) analogy=4, (7), plausibility=5, (8) specificity=5, and (9)  
53 coherence=5. Total score=44/45.

54 **Conclusions and relevance** Nine Bradford Hill causality criteria strongly supported a causal  
55 relationship between the BMI formula derived and mean BMIs of worldwide cohorts. The  
56 artificial intelligence methodology introduced could inform individual, clinical, and public health  
57 strategies regarding overweight/obesity prevention/treatment and other health outcomes.  
58

## 59 **Introduction**

60 According to IBM Cloud Education, “At its simplest form, artificial intelligence is a  
61 field, which combines computer science and robust datasets, to enable problem-  
62 solving.”<sup>1</sup> The analysis dataset here formatted from 1.4 gigabytes of global burden of  
63 disease (GBD) worldwide data and the BMI multiple regression derived risk factor  
64 formula (BMI formula) satisfy this definition of artificial intelligence.

65  
66 In an editorial in the BMJ titled, “Implausible results in human nutrition research”, influential  
67 Stanford University meta researcher, Dr. John Ioannidis detailed why, in his words, “definitive  
68 solutions won’t come from another million observational papers or small randomized trials.”<sup>2</sup> Dr.  
69 Ioannidis called for radical reform of nutritional epidemiology methodologies used to influence  
70 food/agricultural policies and to produce dietary guidelines for clinicians and the public.<sup>3</sup> This  
71 study analysing GBD worldwide data of dietary and other risk factors for BMI attempts to  
72 answer Dr. Ioannidis’ call.

73  
74 This paper will use formatted, population weighted GBD data to derive a multiple regression  
75 BMI formula (BMI formula). The BMI formula modeled will be comprised of dietary and other  
76 risk factors with coefficients equated to their population attributable fractions (PAFs) related to  
77 the mean BMIs of worldwide cohorts.

78  
79 We used Bradford Hill causality criteria to test the BMI formula. Satisfying Bradford Hill  
80 causality criteria is considered validating in epidemiological research.<sup>4</sup> We hypothesized that AI  
81 analytics would significantly contribute to understanding the risks for obesity.

## 82 **Methods**

83 As volunteer collaborators with the Institute of Health Metrics and Evaluation (IHME), we  
84 received raw GBD ecological data ( $\approx 1.4$  Gigabytes) on mean BMIs of male and female cohorts  
85 15-49 years old and 50-69 years old from each year 1990-2017 from 195 countries and 365  
86 subnational locations ( $n=1120$  cohorts). We also utilized GBD data on exposures to 32 risk  
87 factors and covariates potentially related to BMI.

88  
89 Food risk factors came from surveys of individuals as g/day. IHME dietary covariate data  
90 originally came from Food and Agriculture Organization data on animal and plant food  
91 commodities available percapita in countries worldwide—as opposed to consumption data from  
92 participant interviews.<sup>5</sup> Supplementary Table 1 lists the relevant GBD risk factors, covariates,  
93 and other available variables with definitions of those risk factor exposures.<sup>6</sup>

94  
95 GBD worldwide citations of over 12,000 surveys constituting ecological data inputs for this  
96 analysis are available from IHME.<sup>5</sup> The main characteristics of IHME GBD data sources for  
97 BMI, the protocol for the GBD study, and all risk factor values have been published by IHME  
98 GBD data researchers and discussed elsewhere.<sup>7-10</sup> These included detailed descriptions of  
99 categories of input data, potentially important biases, and methodologies of analysis. We did not  
100 clean or pre-process any of the GBD data. GBD cohort risk factor and BMI data from the IHME  
101 had no missing records. The updated 2019 raw data with variables we used for this analysis may  
102 be obtained by volunteer researchers collaborating with IHME.<sup>11</sup>

103

104 To maximally utilize the available data, we averaged the values for ages 15-49 years old together  
105 with 50-69 years old for BMI and for each risk factor exposure for each male and female cohort  
106 for each year. Finally, for each male and female cohort, data from all 28 years (1990-2017) on  
107 mean BMI and on each of the risk factor exposures were averaged using the computer software  
108 program R.

109  
110 To weigh the country and subnational data according to population, internet searches (mostly  
111 Wikipedia) yielded the most recent population estimates for countries and subnational states,  
112 provinces, and regions. World population data from the World Bank and the Organisation for  
113 Economic Co-operation and Development could not be used because they did not include all 195  
114 countries or any subnational data.

115  
116 Using the above-described formatted dataset of risk factors, covariates, and BMIs, a software  
117 program in R generated a population-weighted analysis dataset. Each male or female cohort in  
118 the population-weighted analysis dataset represented approximately 1 million people (range: <  
119 100,000 to 1.5 million). The analysis dataset had n=7846 cohorts (rows of data), half male and  
120 half female, representative of over seven billion people.

121  
122 Supplementary Table 2 details how we converted omega-3 fatty acid g/day to fish g/day using  
123 data on the omega-3 fatty acid content of frequently eaten fish from the National Institutes of  
124 Health Office of Dietary Supplements (USA).<sup>12</sup> As shown in Supplementary Table 3, we  
125 converted all of the animal and plant food data, including alcohol and sugary beverage  
126 consumption, from g/day to kcal/day. For the g to kcal conversions, we used the Nutritionix track

127 app,<sup>13</sup> which tracks types and quantities of foods consumed. Saturated fatty acids (SFA) risk  
128 factor (0-1 portion of the entire diet) was not available with GBD data from 2017, so GBD SFA  
129 risk factor data from 2016 was used. Polyunsaturated fatty acid (PUFA) and trans fatty acid  
130 (TFA) GBD risk factor data from 2017 (0-1 portion of the entire diet) were also utilized. These  
131 fatty acid data were converted to kcal/day by multiplying the fatty acid 0-1 portion of the entire  
132 diet by the kcal/day available for each cohort.

133

### 134 **Statistical methods**

135 To determine the strengths of the risk factor correlations with mean BMIs of population  
136 weighted worldwide cohorts (7846 cohorts) or subgroups of cohorts (e.g., continents, socio-  
137 demographic quartiles, etc.), we utilized Pearson correlation coefficients:  $r$ , 95% confidence  
138 intervals (95% CIs), and  $p$  values.

139

140 In seeking to derive the optimal BMI multiple regression formula from worldwide data, we  
141 determined our methodology as we proceeded by experimenting with strategies to optimize the  
142 functioning of candidate BMI formulas derived by

143

- 144 1. including as many as possible of the available dietary variables,
- 145 2. combining dietary variables if appropriate, and
- 146 3. including physical activity and other plausibly informative variables.

147

148 Appendix 1 explains the use of Bradford Hill causality criteria to assess whether the risk factors  
149 in the BMI formula derived accurately modeled the worldwide mean BMI. Briefly, we tested the



150 BMI formula output with the Bradford Hill causality criteria (1) strength, (2) experimentation,  
151 (3) consistency, (4) dose response, (5) temporality, (6) analogy, (7) plausibility, (8) specificity,  
152 and (9) coherence. For each criterion, we used a 0-5 scale to assess the magnitude of support of  
153 the BMI formula output being causally related to the BMIs worldwide (0=no support of causality  
154 to 5=very strong support of causality, total possible points=45).

155  
156 In determining the variables to include and exclude in worldwide BMI formula, we set the  
157 statistical threshold for a variable to enter and to remain in the formula at  $p < 0.25$ . We used SAS  
158 and SAS Studio statistical software 9.4 (SAS Institute, Cary, NC) for the data analysis.

159

160

## 161 **Results**

162 Table 1 shows the basic statistics and univariate correlations of mean cohort BMI worldwide  
163 with mean dietary and other risk factor values. Whole grains, legumes, rice, and sweet potatoes  
164 negatively correlated with BMI. We designated them, “BMI decreasing foods.” The six animal  
165 foods (processed meat, red meat, fish, milk, poultry, and eggs), alcohol, sugary beverages, corn  
166 availability, potato availability, added SFA, added PUFA, and added TFA all positively  
167 correlated with BMI. We designated them, “BMI increasing foods.”

168  
169 In Supplementary Table 4, which shows BMI risk factor to risk factor correlations, corn  
170 availability (kcal/day percapita, a covariate) correlated moderately strongly with sugary  
171 beverages ( $r=0.419$ , 95% CI 0.400 to 0.437,  $p<0.0001$ ), suggesting that high fructose corn syrup  
172 may have accounted for the unexpected positive correlation of corn with BMI.

173  
174 According to the International Potato Center, potato availability (a covariate), which positively  
175 correlated with BMI, included  $\geq 50\%$  highly processed potato products worldwide,<sup>14</sup> likely  
176 accounting for the positive correlation of potatoes with BMI.

177  
178 The strong positive correlations of fruits, vegetables, and nuts and seeds with BMI (Table 1)  
179 were unexpected. These findings suggested likely multicollinearity of fruits, vegetables, and nuts  
180 and seeds with BMI increasing foods (when an independent variable is highly correlated with  
181 one or more known or unknown other independent variables). Supplementary Table 4 shows the  
182 univariate correlations of each of the BMI formula risk factors with each other risk factor. Fruits,  
183 vegetables and nuts and seeds strongly positively correlated with 10 of the 13 dietary variables

184 that positively correlated with BMI (six animal-based foods, alcohol, SFA, PUFA, and TFA).  
185 Fruits, vegetables and nuts and seeds negatively correlated with the four other plant-based foods  
186 (whole grains, legumes, rice, and sweet potatoes), except fruits was not significantly correlated  
187 with whole grains. Together, these findings strongly suggested that multicollinearities accounted  
188 for the positive correlations of fruits, vegetables, and nuts and seeds with BMI.

189  
190 Supplementary Table 5 shows the Excel spreadsheet calculations, which were coordinated with  
191 SAS multiple regressions involved in the derivation of the worldwide BMI formula. Appendix 2  
192 detailed the steps in the BMI (dependent variable) versus BMI risk factors (independent  
193 variables) multiple regression formula derivation. As seen in Supplementary Table 5, described  
194 in Appendix 2, and contrasted with the current method of deriving PAFs,<sup>15-17</sup> the BMI formula  
195 versus BMI variance ( $R^2=0.8096$ ) \* 100 determined the total PAF (80.96%) accounted for by the  
196 BMI formula. The 23 risk factor coefficients could then be equated to the PAFs of those risk  
197 factors. The resulting BMI formula is shown below (all foods in kcal/day):

198  
199 BMI formula = (0.37% \* processed meat + 4.23% \* red meat + 0.020% \* fish + 2.24% \*  
200 milk + 5.67% \* poultry + 1.77% \* eggs + 0.338% \* alcohol + 0.99% \* sugary beverages  
201 + 0.04% \* corn + 0.72% \* potatoes + 8.48% \* saturated fatty acids + 3.89% \*  
202 polyunsaturated fatty acids + 0.27% \* trans fatty acids - 2.99% \* fruit - 4.07% \*  
203 vegetables - 0.37% \* nuts and seeds - 0.45 \* whole grains - 1.49% \* legumes - 8.62% \*  
204 rice - 0.10% \* sweet potatoes - 7.45% \* physical activity (METs/week) - 20.38% \* child  
205 underweight ( $\geq 2$  SD below mean BMI) + 6.02% \* sex (male=1, female=2)) \* 0.05012 +  
206 21.77.

207

## 208 **BMI formula output analyzed by Bradford Hill causality criteria**

209 As mentioned in the methods and detailed in Appendix 1, the nine Bradford Hill causality  
210 criteria tested the functionality of the BMI formula:

- 211 1. Strength score=5 for  $r > 0.500$ ,  $p < 0.0001$ —The BMI formula's output regressed with  
212 mean BMI of worldwide cohorts gave  $r = 0.907$  (95% CI: 0.903 to 0.911)  $p < 0.0001$ ,  
213  $R^2 = 0.8096$ , total percent weight=80.96%.
- 214 2. Experiment score=5 for all 20 bootstrap trial BMI formulas with  $r > 0.500$ ,  $p < 0.0001$ —  
215 Table 2 shows bootstrapping the BMI formula related to mean worldwide BMI with 20  
216 trials (repeated sampling from the worldwide analysis dataset with replacements<sup>18</sup>). Each  
217 trial had 100 randomly selected cohorts to generate a unique BMI formula. As Table 2  
218 shows, the mean values for BMI and the risk factor PAFs were all quite close to the mean  
219 values for BMI and BMI risk factors in the worldwide BMI formula (last column).
- 220 3. Consistency score=5 for the mean of absolute differences of BMI formula outputs and  
221 mean BMI  $< 0.300 \text{ kg/M}^2$ —In Table 3, we used 37 subsets of worldwide BMI and risk  
222 factor data to test the consistency of BMI formula outputs, utilizing the 20 bootstrap trials  
223 (#2 Experiment) to generate 80% confidence intervals for each subset. Table 3 shows the  
224 average absolute difference between the 37 subgroups mean BMIs and BMI formula  
225 outputs was  $0.252 \text{ kg/M}^2$ .
- 226 4. Dose-response (Biological gradient) score=5 for the mean of absolute differences of BMI  
227 formula outputs and mean BMI for the dose-response quartiles  $< 0.300 \text{ kg/M}^2$ —Table 3  
228 also shows that the mean of the BMI absolute differences between the BMI formula  
229 estimates and mean BMIs in the four dose-response quartiles was  $0.220 \text{ kg/M}^2$ .

230 **5.** Temporality score=5 for the BMI trend formula versus BMI trend  $r>0.500$ ,  
231  $p<0.0001$ —As is shown in Supplementary Table 6 and detailed in Appendix 1, a  
232 multiple regression analysis with the worldwide BMI trend 1990-2007 (dependent  
233 variable) versus 22 of the 23 risk factor trends (independent variables excluding sex)  
234 generated a BMI trend formula (All foods are in Kcal/day.):

235  
236 BMI trend formula=  $-0.00 * \text{processed meat} + 2.52 * \text{red meat} - 0.15 * \text{fish} +$   
237  $0.22 * \text{milk} + 5.46 * \text{poultry} + 1.89 * \text{eggs} + 0.07 * \text{alcohol} + 0.12 * \text{sugary}$   
238  $\text{beverages} - 0.02 * \text{corn} + 0.49 * \text{potatoes} - 0.01 * \text{saturated fatty acids} + 1.01 * \text{polyunsaturated fatty acids}$   
239  $- 0.01 * \text{trans fatty acids} + 3.89 * \text{fruit} + 5.92 * \text{vegetables} + 0.11 * \text{nuts and seeds} + 0.05 * \text{whole grains} - 0.88 * \text{legumes} + 3.28$   
240  $* \text{rice} + 3.09 * \text{sweet potatoes} + 4.91 * \text{physical activity (METs/week)} - 0.93 * \text{child underweight} (\geq 2 \text{ SD below mean BMI}).$

241  
242  
243  
244 As with the BMI formula, the coefficients of the BMI risk factor trends formula were  
245 equated to their PAFs. BMI trend formula  $r=0.592$ , 95% CI: 0.577 to 0.606,  
246  $p<0.0001$ , and total PAF=35.02%.

247 **6.** Analogy score=4—The three metabolic risk factors correlated with BMI to test  
248 analogy were systolic blood pressure (SBP), low density lipoprotein cholesterol  
249 (LDL-C), and fasting plasma glucose (FPG).

- 250 • BMI correlated with SBP:  $r=0.102$ , 95% CI: 0.080 to 0.124,  $p<0.0001$ .
- 251 • BMI correlated with FPG:  $r=0.558$ , 95% CI: 0.542 to 0.573,  $p<0.0001$ .
- 252 • BMI correlated with LDL-C:  $r=0.756$ , 95% CI: 0.746 to 0.765,  $p<0.0001$ .

253 Since BMI versus SBP  $r<0.500$ , Bradford Hill causality score=4.

254 **7. Plausibility: Score=5**—Based on systematic medical literature reviews, physical  
255 activity inversely correlated with BMI,<sup>19</sup> and BMI directly correlated with intakes  
256 of sugary beverages,<sup>20</sup> alcohol,<sup>21</sup> and animal foods.<sup>22</sup> The relationship of adult  
257 BMI with early childhood severe underweight has not been reported worldwide.  
258 Since people in poor countries with high infant/childhood malnutrition have fewer  
259 resources to obtain animal foods, fatty acids, and alcohol and more need for  
260 physical exercise than in developed countries, it is highly plausible that childhood  
261 severe underweight negatively correlated with lower BMI in adulthood.

262 **8. Specificity: Score=5** for the BMI formula being unique.—The BMI formula was  
263 specific to worldwide BMI and would have been different from risk factor  
264 formulas modeling SBP, FPG, LDL-C, or any health outcome.

265 **9. Coherence: Score=5**—As evidenced by the near perfect score 39/40 on the first eight  
266 criteria, the BMI formula accurately modeled worldwide mean BMI—total causality  
267 criteria score: 44/45.

268  
269 Table 5 shows BMI formula estimates for various patterns of diet and/or other BMI formula risk  
270 factors. For instance, increasing physical activity by adding a run for 1 hour/day at six miles/hour  
271 on average along with decreasing BMI increasing foods by isocalorically shifting 25% of BMI  
272 increasing foods (Kcal/day) to BMI decreasing foods was projected to reduce the mean cohort  
273 BMI from 26.66 kg/M<sup>2</sup> to mean BMI=22.26 kg/M<sup>2</sup>.

274

275

## 276 **Discussion**

277 Appendix 2 discusses the derivation of PAFs with comparable risk assessment (CRA)  
278 methodology by the World Health Organization<sup>15</sup> and the IHME<sup>16</sup> based on systemic literature  
279 reviews. Appendix 2 details the steps in the derivation of the GBD data based BMI formula  
280 (Supplemental Table 5), which precisely calculate 23 risk factor PAFs, totaling the BMI formula  
281 PAF. Appendix 1 provides the metrics for validation by the nine Bradford Hill causality criteria.

282  
283 A review of the literature on food costs relative to nutrient quality found that the median costs of  
284 starches (€0.14/100 kcal) was quite low relative to fruits and vegetables (€0.82/100 kcal),  
285 meat/eggs/fish (€0.64/100 kcal), fresh dairy (€0.32/100 kcal), and nuts (€0.25/100 kcal).<sup>23</sup> This  
286 suggests that people who can afford fruits, vegetables and nuts and seeds are people who also  
287 can afford high quantities of the BMI increasing foods—animal foods, sugary beverages, high  
288 fructose corn syrup, alcohol, and highly processed foods (e.g., potato chips and fries). The  
289 economics of food, including the high cost of fruits, vegetables, and nuts and seeds, may  
290 contribute to overweight and obesity in the USA and in other affluent countries.

291  
292 The Supplemental Nutrition Assistance Program (SNAP—formerly Food Stamps) spent an  
293 estimated 22.6% of its \$73 billion/year budget<sup>24</sup> on payments to low-income Americans for  
294 “sweetened beverages, prepared desserts, salty snacks, candy, and sugar.”<sup>25</sup> Additionally, the US  
295 Department of Agriculture (USDA) has subsidized crops that go primarily for animal feed or that  
296 are processed into sugars while not subsidizing fruits and vegetables.<sup>26</sup> While the USDA  
297 recognizes the relatively low intake of fruits and vegetables in the USA and sponsors a publicity

298 campaign to increase fruits and vegetables consumption,<sup>27</sup> USDA expenditures should promote  
299 reduced prices of BMI decreasing foods and increased prices of BMI increasing foods.

300  
301 Following a low-carbohydrate, high-fat diet has been demonstrated to cause modest short term  
302 weight loss in obese people,<sup>28</sup> However, the BMI formula projects that the long-term effect of a  
303 low-carb, high fat diet would be a mean cohort BMI of 29.05 kg/M<sup>2</sup> (Table 5).

304

### 305 **Limitations**

306 The GBD data on animal foods, plant foods, alcohol, and fatty acids were not comprehensive and  
307 comprised only 1191.4 Kcal/day on average worldwide. Subnational data were available on only  
308 four countries. Because the data formatting and statistical methodology were new, this was  
309 necessarily a post hoc analysis and no pre-analysis protocol or Bradford Hill causality criteria  
310 scoring system was possible. As detailed in the Foresight Report on obesity,<sup>29</sup> obesity is affected  
311 by a complex system of interacting factors besides diet, physical activity, and childhood feeding  
312 patterns, and sex. So genes,<sup>30</sup> gut microbiome,<sup>31</sup> ultra-processing of food,<sup>32,33</sup> and other  
313 influences on BMI were outside of the purview of this analysis.

314

### 315 **Generalizability**

316 Given the strength and consistency of the relationship of the mean cohort BMI with the BMI  
317 formula estimates (Tables 1- 4), the findings should be generalizable to people all over the  
318 world. The results could be further refined for relatively high SDI countries by deriving a BMI  
319 formula from the four countries that have subnational data (UK, USA, Mexico, and Japan).



## 320 **Conclusion**

321 Nine Bradford Hill causality criteria strongly supported that the worldwide obesity epidemic is  
322 causally related, in large part but not exclusively to 23 risk factors in proportion to their PAFs in  
323 the BMI formula. The findings in this study should be considered by health policymakers  
324 drafting dietary guidelines for healthy weight management. While this study dealt only with  
325 dietary and other available risk factors for BMI (overweight/obesity), the AI methodology  
326 introduced could easily apply to estimating PAFs of multiple dietary and other risk factors that  
327 pertain to dozens of non-communicable diseases, for which the IHME have GBD data.

328

329

330

331 **Table 1. BMI risk factor basic statistics** □ (n=7846)

| BMI versus BMI risk factors worldwide n=7846<br>□ | Mean   | SD     | Min    | Max    | r       | 95% CI low | 95% CI high | p      | R <sup>2</sup> |
|---------------------------------------------------|--------|--------|--------|--------|---------|------------|-------------|--------|----------------|
| BMI kg/M <sup>2</sup>                             | 21.77  | 2.290  | 17.95  | 29.39  |         |            |             |        |                |
| Processed meat Kcal/day                           | 5.334  | 9.720  | 0.20   | 68.77  | 0.5939  | 0.579      | 0.608       | <.0001 | 0.3527         |
| Red meat Kcal/day                                 | 50.27  | 45.13  | 3.21   | 235.95 | 0.6561  | 0.643      | 0.668       | <.0001 | 0.4304         |
| Fish Kcal/day                                     | 9.985  | 36.52  | 0.40   | 370.36 | 0.1021  | 0.080      | 0.124       | <.0001 | 0.0104         |
| Milk Kcal/day                                     | 25.04  | 27.05  | 1.06   | 146.8  | 0.6762  | 0.664      | 0.688       | <.0001 | 0.4573         |
| Poultry Kcal/day available                        | 44.32  | 50.08  | 1.06   | 411.9  | 0.8086  | 0.801      | 0.816       | <.0001 | 0.6539         |
| Eggs Kcal/day available                           | 19.36  | 14.71  | 0.79   | 69.64  | 0.6835  | 0.672      | 0.695       | <.0001 | 0.4672         |
| Alcohol Kcal/day                                  | 81.03  | 57.33  | 4.25   | 429.8  | 0.1461  | 0.124      | 0.168       | <.0001 | 0.0213         |
| Sugary beverages Kcal/day                         | 298.4  | 152.4  | 72.91  | 1472   | 0.1305  | 0.109      | 0.152       | <.0001 | 0.0170         |
| Corn Kcal/day available                           | 34.72  | 48.28  | 0.16   | 305.2  | 0.0760  | 0.054      | 0.098       | <.0001 | 0.0058         |
| Potatoes Kcal/day available                       | 84.04  | 74.60  | 3.07   | 533.9  | 0.2095  | 0.188      | 0.231       | <.0001 | 0.0439         |
| Saturated fatty acids Kcal/day                    | 190.6  | 63.94  | 70.79  | 481.1  | 0.7033  | 0.692      | 0.714       | <.0001 | 0.4946         |
| PUFAs Kcal/day                                    | 81.10  | 73.44  | 2.93   | 381.3  | 0.7301  | 0.720      | 0.740       | <.0001 | 0.5330         |
| Trans fatty acids Kcal/day                        | 13.23  | 13.65  | 1.99   | 77.76  | 0.4749  | 0.458      | 0.492       | <.0001 | 0.2256         |
| Fruits Kcal/day                                   | 40.21  | 22.50  | 3.58   | 161.4  | 0.6163  | 0.602      | 0.630       | <.0001 | 0.3798         |
| Vegetables Kcal/day                               | 79.76  | 43.12  | 9.48   | 304.2  | 0.5111  | 0.495      | 0.527       | <.0001 | 0.2612         |
| Nuts and seeds Kcal/day                           | 8.414  | 8.357  | 0.05   | 103.0  | 0.4741  | 0.457      | 0.491       | <.0001 | 0.2248         |
| Whole grains Kcal/day                             | 55.65  | 30.93  | 1.14   | 235.1  | -0.2029 | -0.224     | -0.182      | <.0001 | 0.0412         |
| Legumes Kcal/day                                  | 51.74  | 32.23  | 0.51   | 194.7  | -0.3836 | -0.402     | -0.364      | <.0001 | 0.1471         |
| Rice Kcal/day available                           | 141.9  | 116.3  | 1.42   | 461.8  | -0.5572 | -0.572     | -0.542      | <.0001 | 0.3104         |
| Sweet potatoes Kcal/day available                 | 22.76  | 35.95  | 0.02   | 364.7  | -0.1476 | -0.169     | -0.126      | <.0001 | 0.0218         |
| Physical activity METs                            | 4714   | 1368   | 1609   | 7669   | -0.4431 | -0.461     | -0.425      | <.0001 | 0.1964         |
| Child underweight by >2SD                         | 0.1862 | 0.1707 | 0.0039 | 0.5300 | -0.7941 | -0.802     | -0.786      | <.0001 | 0.6306         |
| Sex male 1 and female 2                           | 1.50   | 0.500  | 1.00   | 2.00   | 0.1236  | 0.102      | 0.145       | <.0001 | 0.0153         |
| Total Kcal/day available                          | 2574   | 418    | 1579   | 3898   | 0.8402  | 0.834      | 0.847       | <.0001 | 0.7059         |
| Stop breast feeding <6 months                     | 0.1193 | 0.0555 | 0.0159 | 0.2400 | 0.7989  | 0.791      | 0.807       | <.0001 | 0.6383         |
| Sodium g/d                                        | 4.45   | 2.34   | 1.33   | 9.21   | -0.0170 | -0.039     | 0.005       | 0.1268 | 0.0000         |
| Calcium g/d                                       | 0.301  | 0.179  | 0.081  | 1.04   | 0.7650  | 0.756      | 0.774       | <.0001 | 0.5850         |
| Dietary fiber g/d                                 | 9.21   | 3.15   | 2.72   | 22.68  | 0.3090  | 0.289      | 0.329       | <.0001 | 0.0960         |
| Fasting plasma glucose mmol/L                     | 4.30   | 0.350  | 3.32   | 5.58   | 0.5570  | 0.542      | 0.572       | <.0001 | 0.3110         |
| LDL cholesterol mmol/L                            | 2.35   | 0.400  | 1.27   | 3.25   | 0.7560  | 0.746      | 0.765       | <.0001 | 0.5710         |
| Systolic BP mm Hg                                 | 133.9  | 4.320  | 123.4  | 147.9  | 0.1020  | 0.080      | 0.124       | <.0001 | 0.0100         |
| Socio-demographic index (0-1)                     | 0.543  | 0.174  | 0.112  | 0.900  | 0.7330  | 0.722      | 0.743       | <.0001 | 0.5370         |

332  
333 □ See Supplementary Table 1 for definitions

334 **Table 2. Bootstrap validation experiment: 20 BMI formulas each with 100 random cohorts**

| Worldwide BMI and BMI risk factors | RCT1  | RCT2  | RCT3  | RCT4  | RCT5  | RCT6  | RCT7  | RCT8  | RCT9  | RCT 10 | RCT 11 | RCT 12 | RCT 13 |
|------------------------------------|-------|-------|-------|-------|-------|-------|-------|-------|-------|--------|--------|--------|--------|
| BMI kg/M <sup>2</sup>              | 21.71 | 22.04 | 21.68 | 21.92 | 21.57 | 21.42 | 21.79 | 22.18 | 21.75 | 21.85  | 21.49  | 21.88  | 21.71  |
| Processed meat                     | 0.33  | 0.32  | 0.34  | 0.34  | 0.28  | 0.31  | 0.32  | 0.39  | 0.57  | 0.36   | 0.21   | 0.26   | 0.28   |
| Red meat                           | 3.95  | 3.73  | 4.92  | 3.47  | 3.80  | 3.70  | 3.45  | 4.89  | 5.61  | 3.69   | 3.56   | 3.20   | 3.16   |
| Fish                               | 0.03  | 0.02  | 0.03  | 0.01  | 0.64  | 0.03  | 0.03  | 0.03  | 0.04  | 0.02   | 0.02   | 0.03   | 0.49   |
| Milk                               | 2.13  | 2.29  | 2.40  | 2.19  | 2.04  | 1.95  | 1.89  | 2.39  | 2.66  | 2.14   | 1.68   | 1.83   | 1.43   |
| Poultry                            | 6.62  | 6.24  | 6.60  | 4.82  | 5.36  | 4.33  | 5.92  | 6.72  | 5.41  | 4.84   | 4.48   | 6.55   | 4.15   |
| Eggs                               | 1.81  | 1.68  | 1.84  | 1.45  | 2.17  | 1.70  | 1.57  | 1.85  | 2.10  | 1.65   | 1.59   | 1.46   | 1.39   |
| Alcohol                            | 0.09  | 0.74  | 0.03  | 0.28  | 0.05  | 0.04  | 0.77  | 0.59  | 1.65  | 0.38   | 0.04   | 0.00   | 0.01   |
| Sugary beverages                   | 1.90  | 2.25  | 6.36  | 0.78  | 4.79  | 2.44  | 0.43  | 3.96  | 0.30  | 1.55   | 2.04   | 3.43   | 2.90   |
| Corn                               | 0.04  | 0.00  | 0.09  | 0.01  | 0.26  | 0.02  | 0.14  | 0.27  | 0.00  | 0.01   | 0.32   | 0.28   | 0.32   |
| Potatoes                           | 0.23  | 0.10  | 0.60  | 0.67  | 0.69  | 0.15  | 0.11  | 1.77  | 1.26  | 0.68   | 1.39   | 0.02   | 1.34   |
| SFA                                | 8.56  | 7.14  | 8.55  | 6.96  | 9.12  | 9.81  | 7.44  | 8.52  | 8.80  | 7.75   | 6.66   | 7.10   | 5.97   |
| PUFA                               | 4.30  | 3.97  | 4.31  | 3.16  | 4.09  | 3.59  | 4.09  | 4.12  | 3.96  | 3.66   | 2.84   | 3.30   | 2.84   |
| TFA                                | 0.33  | 0.29  | 0.23  | 0.23  | 0.26  | 0.14  | 0.29  | 0.30  | 0.38  | 0.26   | 0.19   | 0.35   | 0.14   |
| Fruits                             | 3.18  | 2.55  | 3.99  | 3.25  | 3.88  | 2.39  | 1.95  | 3.38  | 2.44  | 2.00   | 2.31   | 2.82   | 2.65   |
| Vegetables                         | 3.22  | 3.39  | 4.70  | 5.83  | 3.67  | 2.95  | 4.38  | 3.79  | 5.06  | 4.04   | 5.51   | 4.46   | 1.87   |
| Nuts and seeds                     | 0.22  | 0.32  | 0.51  | 0.30  | 0.55  | 0.24  | 0.36  | 0.59  | 0.60  | 0.25   | 0.07   | 0.13   | 0.13   |
| Whole grains                       | 0.14  | 0.40  | 0.24  | 0.85  | 0.26  | 0.68  | 0.18  | 0.01  | 0.12  | 0.29   | 1.32   | 0.53   | 0.17   |
| Legumes                            | 2.86  | 1.41  | 0.71  | 1.38  | 1.44  | 1.82  | 1.44  | 1.06  | 1.65  | 1.48   | 1.12   | 1.71   | 1.33   |
| Rice                               | 7.24  | 6.91  | 7.76  | 9.80  | 10.26 | 8.25  | 6.35  | 9.19  | 5.84  | 4.31   | 12.17  | 8.20   | 7.82   |
| Sweet potatoes                     | 0.05  | 0.29  | 0.12  | 0.20  | 0.04  | 0.07  | 0.22  | 0.12  | 0.17  | 0.17   | 0.02   | 0.30   | 0.05   |
| Physical activity                  | 6.65  | 10.11 | 3.69  | 9.29  | 0.66  | 5.71  | 14.65 | 2.63  | 3.81  | 10.17  | 7.80   | 7.37   | 6.38   |
| Child underweight                  | 8.86  | 8.41  | 5.17  | 5.47  | 9.68  | 21.13 | 23.33 | 15.63 | 20.69 | 27.27  | 22.28  | 15.50  | 23.20  |
| Sex M=1, F=2                       | 21.20 | 19.02 | 13.78 | 18.92 | 15.67 | 9.49  | 1.65  | 7.23  | 5.06  | 4.36   | 4.29   | 10.32  | 9.07   |
| Total % weights                    | 83.94 | 81.57 | 76.96 | 79.67 | 79.66 | 80.95 | 80.97 | 79.45 | 78.17 | 81.35  | 81.91  | 79.14  | 77.11  |

| Worldwide BMI and BMI risk factors | RCT 14 | RCT 15 | RCT 16 | RCT 17 | RCT 18 | RCT 19 | RCT 20 | Mean RCTs 1-20 | SD   | 80% CI low | 80% CI high | World mean n=7846 |
|------------------------------------|--------|--------|--------|--------|--------|--------|--------|----------------|------|------------|-------------|-------------------|
| BMI kg/M <sup>2</sup>              | 21.79  | 21.65  | 21.81  | 21.81  | 22.01  | 21.76  | 21.79  | 21.78          | 0.13 | 21.49      | 22.04       | 21.77             |
| Processed meat                     | 0.30   | 0.53   | 0.37   | 0.41   | 0.28   | 0.31   | 0.55   | 0.36           | 0.09 | 0.26       | 0.55        | 0.37              |
| Red meat                           | 2.65   | 4.77   | 3.57   | 4.55   | 2.47   | 3.49   | 5.71   | 3.95           | 0.84 | 2.65       | 5.61        | 4.23              |
| Fish                               | 0.02   | 0.02   | 0.01   | 0.03   | 0.02   | 0.56   | 0.70   | 0.12           | 0.23 | 0.01       | 0.64        | 0.02              |
| Milk                               | 1.84   | 2.29   | 1.79   | 2.51   | 1.58   | 1.80   | 2.50   | 2.10           | 0.33 | 1.58       | 2.51        | 2.24              |
| Poultry                            | 4.55   | 4.91   | 4.87   | 5.66   | 4.66   | 4.52   | 6.87   | 5.43           | 0.87 | 4.33       | 6.72        | 5.67              |
| Eggs                               | 1.47   | 1.51   | 1.33   | 2.01   | 1.32   | 1.61   | 2.08   | 1.69           | 0.25 | 1.33       | 2.10        | 1.77              |
| Alcohol                            | 0.01   | 2.10   | 0.66   | 0.67   | 0.01   | 0.19   | 1.32   | 0.46           | 0.56 | 0.01       | 1.65        | 0.34              |
| Sugary beverages                   | 2.58   | 1.31   | 0.79   | 1.11   | 0.99   | 0.61   | 0.29   | 1.90           | 1.55 | 0.30       | 4.79        | 0.99              |
| Corn                               | 0.37   | 0.00   | 0.54   | 0.11   | 0.22   | 0.35   | 0.00   | 0.15           | 0.16 | 0.00       | 0.37        | 0.04              |
| Potatoes                           | 0.49   | 0.06   | 1.49   | 0.26   | 0.16   | 1.71   | 0.21   | 0.68           | 0.56 | 0.06       | 1.71        | 0.72              |
| SFA                                | 6.28   | 7.85   | 6.26   | 9.46   | 5.28   | 5.56   | 10.62  | 7.77           | 1.41 | 5.56       | 9.81        | 8.48              |
| PUFA                               | 3.09   | 3.93   | 3.53   | 4.87   | 2.99   | 2.81   | 5.02   | 3.73           | 0.62 | 2.84       | 4.87        | 3.89              |
| TFA                                | 0.36   | 0.29   | 0.46   | 0.31   | 0.34   | 0.28   | 0.29   | 0.28           | 0.07 | 0.14       | 0.38        | 0.27              |
| Fruits                             | 2.93   | 3.55   | 3.77   | 2.45   | 2.58   | 2.01   | 2.41   | 2.88           | 0.61 | 2.00       | 3.88        | 2.99              |
| Vegetables                         | 2.89   | 3.97   | 2.99   | 2.68   | 3.26   | 4.29   | 1.73   | 3.88           | 1.15 | 1.87       | 5.51        | 4.08              |
| Nuts and seeds                     | 0.32   | 0.39   | 0.38   | 0.32   | 0.26   | 0.27   | 0.33   | 0.33           | 0.14 | 0.13       | 0.59        | 0.37              |
| Whole grains                       | 0.35   | 0.74   | 0.06   | 0.01   | 0.11   | 0.36   | 0.27   | 0.39           | 0.33 | 0.01       | 0.85        | 0.45              |
| Legumes                            | 0.68   | 1.18   | 0.55   | 2.30   | 0.95   | 0.78   | 1.61   | 1.39           | 0.52 | 0.68       | 2.30        | 1.49              |
| Rice                               | 10.38  | 6.31   | 11.98  | 3.53   | 5.90   | 10.30  | 9.13   | 8.26           | 2.25 | 4.31       | 11.98       | 8.62              |
| Sweet potatoes                     | 0.12   | 0.11   | 0.03   | 0.18   | 0.12   | 0.10   | 0.18   | 0.13           | 0.08 | 0.03       | 0.29        | 0.10              |
| Physical activity                  | 8.54   | 8.15   | 7.04   | 8.47   | 12.49  | 7.95   | 5.06   | 7.48           | 3.10 | 2.63       | 12.49       | 7.45              |
| Child underweight                  | 19.16  | 19.70  | 22.65  | 22.31  | 28.86  | 24.16  | 12.46  | 18.18          | 6.77 | 5.47       | 27.27       | 20.38             |
| Sex M=1, F=2                       | 10.56  | 6.31   | 5.80   | 7.13   | 6.59   | 6.62   | 10.47  | 9.21           | 5.20 | 4.29       | 19.02       | 6.02              |
| Total % weights                    | 79.92  | 80.01  | 74.68  | 81.34  | 81.42  | 80.63  | 79.83  | 80.74          | 2.17 | 76.96      | 81.91       | 80.96             |

335

336

337 **Table 3. Consistency measured with 37 subgroups of worldwide GBD data**

| Subsets of worldwide data on risk factors related to BMI | Final BMI formula n | Mean BMI | BMI formula output | Absolute differences | RCT 1-20 Mean | 80% CI low | 80% CI high | BMI output out of 80% CI |
|----------------------------------------------------------|---------------------|----------|--------------------|----------------------|---------------|------------|-------------|--------------------------|
| SDI quartile 1                                           | 1926                | 24.486   | 24.496             | 0.010                | 24.455        | 24.138     | 24.738      |                          |
| SDI quartile 2                                           | 2096                | 21.827   | 22.158             | 0.331                | 22.185        | 21.900     | 22.523      | 1                        |
| SDI quartile 3                                           | 2220                | 20.401   | 19.931             | 0.471                | 19.976        | 19.584     | 20.338      | 1                        |
| SDI quartile 4                                           | 1604                | 20.306   | 20.546             | 0.240                | 20.554        | 20.329     | 20.903      | 1                        |
| Africa                                                   | 1682                | 21.666   | 21.429             | 0.237                | 21.447        | 21.121     | 21.772      |                          |
| Asia                                                     | 4188                | 20.478   | 20.492             | 0.014                | 20.515        | 20.180     | 20.780      |                          |
| Europe                                                   | 880                 | 24.313   | 24.604             | 0.292                | 24.557        | 24.356     | 24.730      | 1                        |
| North America                                            | 558                 | 25.912   | 25.494             | 0.418                | 25.477        | 25.016     | 25.810      | 1                        |
| Oceania                                                  | 54                  | 24.433   | 25.205             | 0.772                | 25.033        | 24.721     | 25.430      | 1                        |
| South America                                            | 468                 | 23.463   | 24.128             | 0.665                | 24.222        | 23.788     | 24.594      | 1                        |
| Four countries with subnational data                     | 730                 | 24.848   | 24.795             | 0.052                | 24.775        | 24.296     | 25.110      |                          |
| Quartile 1 BMI increasing foods                          | 1967                | 24.089   | 24.365             | 0.275                | 24.362        | 24.120     | 24.584      | 1                        |
| Q2                                                       | 1834                | 21.962   | 21.961             | 0.000                | 21.943        | 21.639     | 22.290      |                          |
| Q3                                                       | 2050                | 20.607   | 20.167             | 0.440                | 20.188        | 19.885     | 20.462      | 1                        |
| Q4                                                       | 1995                | 20.494   | 20.682             | 0.188                | 20.738        | 20.446     | 21.066      |                          |
| Quartile 1 BMI decreasing foods                          | 1475                | 20.612   | 20.273             | 0.339                | 20.312        | 19.955     | 20.650      |                          |
| Q2                                                       | 2275                | 21.125   | 21.049             | 0.076                | 21.056        | 20.731     | 21.345      |                          |
| Q3                                                       | 2171                | 22.405   | 22.377             | 0.028                | 22.410        | 22.117     | 22.772      |                          |
| Q4                                                       | 1925                | 22.695   | 23.084             | 0.389                | 23.067        | 22.846     | 23.411      |                          |
| Quartile 1 physical activity                             | 2371                | 20.480   | 20.311             | 0.169                | 20.314        | 20.062     | 20.555      |                          |
| Q2                                                       | 1573                | 21.663   | 21.881             | 0.217                | 21.912        | 21.658     | 22.230      |                          |
| Q3                                                       | 1998                | 21.325   | 21.324             | 0.001                | 21.343        | 21.026     | 21.727      |                          |
| Q4                                                       | 1904                | 23.923   | 23.963             | 0.039                | 23.974        | 23.553     | 24.369      |                          |
| Male                                                     | 3923                | 21.485   | 21.420             | 0.065                | 21.388        | 21.138     | 21.566      |                          |
| Female                                                   | 3923                | 22.051   | 22.120             | 0.068                | 22.180        | 21.858     | 22.501      |                          |
| Bootstrap trial 1                                        | 100                 | 21.715   | 21.741             | 0.025                | 21.755        | 21.503     | 22.013      |                          |
| Bootstrap trial 2                                        | 100                 | 22.040   | 21.986             | 0.055                | 22.011        | 21.724     | 22.254      |                          |
| Bootstrap trial 3                                        | 100                 | 21.676   | 21.744             | 0.068                | 21.769        | 21.479     | 22.019      |                          |
| Bootstrap trial 4                                        | 100                 | 21.926   | 21.944             | 0.018                | 21.954        | 21.659     | 22.206      |                          |
| UK                                                       | 66                  | 24.994   | 25.245             | 0.250                | 25.155        | 24.739     | 25.497      |                          |
| USA                                                      | 376                 | 26.017   | 25.809             | 0.208                | 25.684        | 25.177     | 26.352      |                          |
| Japan                                                    | 158                 | 21.892   | 22.888             | 0.996                | 22.898        | 22.254     | 23.327      | 1                        |
| Mexico                                                   | 130                 | 24.985   | 23.953             | 1.032                | 24.222        | 23.679     | 24.977      | 1                        |
| Quartile 1 Dose-response: BMI formula versus BMI         | 1928                | 24.763   | 24.949             | 0.186                | 24.936        | 24.617     | 25.230      |                          |
| Q2                                                       | 1469                | 22.568   | 22.480             | 0.088                | 22.525        | 22.187     | 22.805      |                          |
| Q3                                                       | 2647                | 20.872   | 21.069             | 0.197                | 21.069        | 20.884     | 21.325      | 1                        |
| Q4                                                       | 1802                | 19.227   | 18.818             | 0.409                | 18.859        | 18.443     | 19.220      | 1                        |
| Mean of BMI - BMI formula absolute val                   |                     |          |                    | 0.252                |               |            |             |                          |
| Mean of BMI-BMI formula dose response                    |                     |          |                    | 0.220                |               |            |             |                          |
| Total out of range                                       |                     |          |                    |                      |               |            |             | 13                       |

338  
339

340 **Table 4. Trends of BMI and the BMI risk factors (1990-2017)**

| <b>BMI trend versus risk factor trends, n=7846 cohorts</b> | <b>Mean</b> | <b>SD</b> | <b>Min</b> | <b>Max</b> | <b>R</b> | <b>95% CI</b> | <b>95% CI</b> | <b>P</b> | <b>R<sup>2</sup></b> |
|------------------------------------------------------------|-------------|-----------|------------|------------|----------|---------------|---------------|----------|----------------------|
| <b>BMI trend</b>                                           | 0.076       | 0.031     | -0.018     | 0.216      |          |               |               |          |                      |
| <b>Processed meat Kcal/day trend</b>                       | -0.051      | 0.156     | -0.812     | 1.680      | -0.009   | -0.031        | 0.013         | 0.44     | 0.000                |
| <b>Red meat Kcal/day trend</b>                             | 0.556       | 1.084     | -3.291     | 4.731      | 0.410    | 0.392         | 0.428         | <.0001   | 0.168                |
| <b>Fish Kcal/day trend</b>                                 | -0.224      | 0.953     | -0.130     | 9.790      | -0.158   | -0.180        | -0.137        | <.0001   | 0.025                |
| <b>Milk Kcal/day trend</b>                                 | 0.190       | 0.299     | -2.018     | 2.503      | 0.206    | 0.185         | 0.227         | <.0001   | 0.043                |
| <b>Poultry Kcal/day trend</b>                              | 1.146       | 1.042     | -0.871     | 7.655      | 0.420    | 0.402         | 0.439         | <.0001   | 0.177                |
| <b>Eggs Kcal/day trend</b>                                 | 0.300       | 0.492     | -0.877     | 1.275      | 0.484    | 0.467         | 0.501         | <.0001   | 0.234                |
| <b>Alcohol Kcal/day trend</b>                              | 0.031       | 0.164     | -0.914     | 1.993      | 0.289    | 0.268         | 0.309         | <.0001   | 0.083                |
| <b>Sugary beverages Kcal/day trend</b>                     | 0.289       | 1.139     | -5.401     | 14.001     | 0.125    | 0.103         | 0.147         | <.0001   | 0.016                |
| <b>Corn Kcal/day available trend</b>                       | -0.028      | 0.606     | -4.355     | 2.809      | 0.141    | 0.119         | 0.162         | <.0001   | 0.020                |
| <b>Potatoes Kcal/day available trend</b>                   | 0.246       | 1.837     | -12.59     | 11.031     | 0.272    | 0.251         | 0.292         | <.0001   | 0.074                |
| <b>SFA Kcal/day trend</b>                                  | 0.210       | 0.925     | -3.660     | 2.095      | -0.050   | -0.072        | -0.028        | <.0001   | 0.002                |
| <b>PUFA Kcal/day trend</b>                                 | 0.996       | 0.959     | -3.026     | 5.473      | 0.286    | 0.266         | 0.306         | <.0001   | 0.082                |
| <b>TFA kcal/day trend</b>                                  | -0.210      | 0.446     | -2.681     | 0.013      | -0.066   | -0.088        | -0.044        | <.0001   | 0.004                |
| <b>Fruits Kcal/day trend</b>                               | 0.623       | 0.604     | -2.078     | 4.104      | 0.481    | 0.464         | 0.498         | <.0001   | 0.232                |
| <b>Vegetables Kcal/day trend</b>                           | 1.399       | 1.614     | -7.961     | 8.465      | 0.396    | 0.377         | 0.415         | <.0001   | 0.157                |
| <b>Nuts and seeds Kcal/day trend</b>                       | 0.276       | 0.265     | -0.338     | 3.124      | 0.123    | 0.101         | 0.144         | <.0001   | 0.015                |
| <b>Whole grains Kcal/day trend</b>                         | 0.173       | 0.586     | -2.604     | 8.463      | 0.104    | 0.082         | 0.126         | <.0001   | 0.011                |
| <b>Legumes Kcal/day trend</b>                              | 0.370       | 0.979     | -3.240     | 5.401      | -0.298   | -0.318        | -0.277        | <.0001   | 0.089                |
| <b>Rice Kcal/day available trend</b>                       | -0.787      | 1.292     | -5.051     | 3.496      | -0.393   | -0.412        | -0.374        | <.0001   | 0.155                |
| <b>Sweet potatoes Kcal/day available trend</b>             | -0.460      | 1.339     | -4.818     | 3.905      | -0.499   | -0.516        | -0.482        | <.0001   | 0.249                |
| <b>Physical activity METs trend</b>                        | 4.724       | 6.826     | -33.86     | 28.629     | 0.379    | 0.360         | 0.398         | <.0001   | 0.144                |
| <b>Child underweight &gt;2SD trend</b>                     | -0.004      | 0.004     | -0.014     | 0.001      | 0.045    | 0.023         | 0.067         | <.0001   | 0.002                |

341

342 **Table 5. BMI formula predictions with different diet or other risk factor scenarios  $\beta$**

| <b>Risk factor scenario</b>                                                                      | <b>BMI<br/>kg/M<sup>2</sup></b> | <b>BMI<br/>kg/M<sup>2</sup><br/>predicted</b> | <b>80 %<br/>CI low</b> | <b>80 %<br/>CI<br/>high</b> |
|--------------------------------------------------------------------------------------------------|---------------------------------|-----------------------------------------------|------------------------|-----------------------------|
| <b>World (n=7846 cohorts mean 1990-2017)</b>                                                     | 21.77                           | 21.77                                         | 21.33                  | 22.13                       |
| <b>World with all children severely underweight</b>                                              |                                 | 16.90                                         | 15.79                  | 18.05                       |
| <b>World with no children severely underweight</b>                                               |                                 | 22.88                                         | 22.35                  | 23.38                       |
| <b>USA</b>                                                                                       | 26.67                           | 26.08                                         | 25.30                  | 26.43                       |
| <b>USA 25% kcal shifted to BMI decreasing foods<sup>†</sup></b>                                  |                                 | 23.41                                         | 22.31                  | 23.93                       |
| <b>USA physical activity mean plus 1 hour/day run</b>                                            |                                 | 24.94                                         | 24.05                  | 25.67                       |
| <b>USA physical activity mean + 1 hour run and 25% shift to BMI decreasing foods<sup>†</sup></b> |                                 | 22.26                                         | 21.63                  | 23.00                       |
| <b>USA no red or processed meat</b>                                                              |                                 | 25.36                                         | 24.67                  | 25.72                       |
| <b>USA no sugary beverages</b>                                                                   |                                 | 26.03                                         | 25.17                  | 26.34                       |
| <b>USA vegetarian</b>                                                                            |                                 | 24.13                                         | 23.44                  | 24.47                       |
| <b>USA vegan</b>                                                                                 |                                 | 23.47                                         | 22.67                  | 23.97                       |
| <b>EAT-Lancet diet</b>                                                                           |                                 | 22.86                                         | 21.67                  | 23.53                       |
| <b>Low Carb Mediterranean Diet</b>                                                               |                                 | 29.05                                         | 27.92                  | 29.54                       |

343  $\beta$  BMI formula estimates based on 28 years of following dietary and risk factor patterns

344 <sup>†</sup> Kcal/day 13 BMI increasing foods isocalorically shifted to the 7 BMI decreasing foods in the

345 BMI formula, distributed proportionally.

346

347

348 Supplementary Table 1. Definitions of IHME GBD risk factors and covariates related to BMI

| <b>Variables</b>                   | <b>Definition</b>                                                                                                                                                                                                                                                                                                                                                                                                                                                                    |
|------------------------------------|--------------------------------------------------------------------------------------------------------------------------------------------------------------------------------------------------------------------------------------------------------------------------------------------------------------------------------------------------------------------------------------------------------------------------------------------------------------------------------------|
| <b>Alcohol</b>                     | Any alcohol consumption (g/day)                                                                                                                                                                                                                                                                                                                                                                                                                                                      |
| <b>Body-mass index</b>             | Body mass index (BMI) (kg/m <sup>2</sup> )—the dependent variable of interest                                                                                                                                                                                                                                                                                                                                                                                                        |
| <b>Child underweight</b>           | Proportion of children – 3 SD to – 2 SD of the WHO 2006 standard weight-for-age curve (0-1)                                                                                                                                                                                                                                                                                                                                                                                          |
| <b>Corn</b>                        | Corn availability percapita (g/day), a covariate                                                                                                                                                                                                                                                                                                                                                                                                                                     |
| <b>Discontinued breast feeding</b> | Proportion of children aged 6-23 months who do not receive any breast milk                                                                                                                                                                                                                                                                                                                                                                                                           |
| <b>Eggs</b>                        | Eggs availability percapita (g/day) a covariate                                                                                                                                                                                                                                                                                                                                                                                                                                      |
| <b>Fasting plasma glucose</b>      | Fasting plasma glucose (mmol/L)                                                                                                                                                                                                                                                                                                                                                                                                                                                      |
| <b>Fish</b>                        | This variable expressed in g/day was derived by determining the weight of fish in g corresponding to 1 g of omega-3 fatty acids (eicosapentaenoic acid and docosahexaenoic acid) by averaging the fish g per 1 g of omega-3 fatty acids 20 species of fish= 117.04 g/day fish/1 g/day omega-3 fatty acids (Supplementary Table 2)                                                                                                                                                    |
| <b>Fruits</b>                      | Consumption of fruits (includes fresh, frozen, cooked, canned, or dried fruit but excludes fruit juices and salted or pickled fruits) (g/day)                                                                                                                                                                                                                                                                                                                                        |
| <b>Kilocalories available /day</b> | The mean number of kilocalories percapita available per day to people in each location (kcal/day available), a covariate                                                                                                                                                                                                                                                                                                                                                             |
| <b>LDL cholesterol</b>             | Serum low-density lipoprotein cholesterol (mmol/L)                                                                                                                                                                                                                                                                                                                                                                                                                                   |
| <b>Legumes</b>                     | Consumption of beans, lentils, pulses (g/day)                                                                                                                                                                                                                                                                                                                                                                                                                                        |
| <b>Milk</b>                        | Consumption of milk including non-fat, low-fat, and full-fat milk but excluding soy milk and other plant derivatives (g/day)                                                                                                                                                                                                                                                                                                                                                         |
| <b>Nuts and seeds</b>              | Consumption of nuts and seeds (g/day)                                                                                                                                                                                                                                                                                                                                                                                                                                                |
| <b>Physical activity</b>           | Average weekly physical activity at work, home, transport-related and recreational measured by MET min per week. Less than 3000 METs per week constitutes low physical activity.                                                                                                                                                                                                                                                                                                     |
| <b>Poultry</b>                     | Poultry availability percapita (g/day), a covariate                                                                                                                                                                                                                                                                                                                                                                                                                                  |
| <b>Potatoes</b>                    | Potatoes availability percapita (g/day), a covariate                                                                                                                                                                                                                                                                                                                                                                                                                                 |
| <b>Processed meat</b>              | Consumption of any processed meat (includes meat preserved by smoking, curing, salting, or addition of chemical preservatives, including bacon, salami, sausages, or deli or luncheon meats like ham, turkey, and pastrami) (g/day)                                                                                                                                                                                                                                                  |
| <b>Red meat</b>                    | Consumption of red meat (includes beef, pork, lamb, and goat but excludes poultry, fish, eggs, and all processed meats) (g/day)                                                                                                                                                                                                                                                                                                                                                      |
| <b>Rice</b>                        | Rice availability percapita (g/day), a covariate                                                                                                                                                                                                                                                                                                                                                                                                                                     |
| <b>Seafood omega-3 fatty acids</b> | Seafood omega-3 fatty acids (eicosapentaenoic acid and docosahexaenoic acid) in tablet or fish form (g/day)                                                                                                                                                                                                                                                                                                                                                                          |
| <b>Socio-demographic index</b>     | SDI is a composite indicator of development status that was originally constructed for GBD 2015, and is derived from components that correlate strongly with health outcomes. It is the geometric mean for indices of the total fertility rate among women younger than 25 years, mean education for those aged 15 years or older, and lag-distributed income per capita. The resulting metric ranges from 0 to 1, with higher values corresponding to higher levels of development. |
| <b>Sugar-sweetened beverages</b>   | Consumption of any beverage with ≥50 calories of sugar per one-cup serving, including carbonated beverages, sodas, energy drinks, fruit drinks but excluding 100% fruit and vegetable juices (g/day)                                                                                                                                                                                                                                                                                 |
| <b>Sweet potatoes</b>              | Sweet potato availability percapita (g/day), a covariate                                                                                                                                                                                                                                                                                                                                                                                                                             |
| <b>Systolic blood pressure</b>     | Systolic blood pressure (mm Hg)                                                                                                                                                                                                                                                                                                                                                                                                                                                      |
| <b>Total sugar</b>                 | Total sugar availability percapita (g/day), a covariate                                                                                                                                                                                                                                                                                                                                                                                                                              |

|                     |                                                                                                                                                                                                 |
|---------------------|-------------------------------------------------------------------------------------------------------------------------------------------------------------------------------------------------|
| <b>Vegetables</b>   | Consumption of frozen, cooked, canned, or dried vegetables (including legumes but excluding salted or pickled, juices, nuts and seeds, and starchy vegetables such as potatoes or corn) (g/day) |
| <b>Whole grains</b> | Consumption of whole grains (bran, germ, and endosperm in their natural proportions) from breakfast cereals, bread, rice, pasta, biscuits, muffins, tortillas, pancakes, and others (g/day)     |

349

350



351 **Supplementary Table 2. Omega-3 Fatty Acid g to fish g calculation¶**

| <b>Fish</b>                                                | <b>DHA g/3 ounce fish</b> | <b>EPA g/3 ounce fish</b> | <b>Omega-3 Fatty Acids (DHA + EPA) g/3 ounce fish mean</b> | <b>Fish 3 ounces = 85.02 g</b> | <b>Fish (g) per omega-3 Fatty Acids (g)=columns E/F</b> |
|------------------------------------------------------------|---------------------------|---------------------------|------------------------------------------------------------|--------------------------------|---------------------------------------------------------|
| <b>Salmon Atlantic farmed</b>                              | 1.24                      | 0.59                      |                                                            |                                |                                                         |
| <b>Salmon Atlantic wild</b>                                | 1.22                      | 0.35                      |                                                            |                                |                                                         |
| <b>Herring Atlantic</b>                                    | 0.94                      | 0.77                      |                                                            |                                |                                                         |
| <b>Sardines canned in tomato sauce drained</b>             | 0.74                      | 0.45                      |                                                            |                                |                                                         |
| <b>Mackerel Atlantic</b>                                   | 0.59                      | 0.43                      |                                                            |                                |                                                         |
| <b>Salmon pink canned drained</b>                          | 0.63                      | 0.28                      |                                                            |                                |                                                         |
| <b>Trout rainbow wild</b>                                  | 0.44                      | 0.40                      |                                                            |                                |                                                         |
| <b>Oysters eastern wild</b>                                | 0.23                      | 0.30                      |                                                            |                                |                                                         |
| <b>Sea bass</b>                                            | 0.47                      | 0.18                      |                                                            |                                |                                                         |
| <b>Shrimp</b>                                              | 0.12                      | 0.12                      |                                                            |                                |                                                         |
| <b>Lobster</b>                                             | 0.07                      | 0.10                      |                                                            |                                |                                                         |
| <b>Tuna light canned in water drained</b>                  | 0.17                      | 0.02                      |                                                            |                                |                                                         |
| <b>Tilapia</b>                                             | 0.11                      |                           |                                                            |                                |                                                         |
| <b>Scallops</b>                                            | 0.09                      | 0.06                      |                                                            |                                |                                                         |
| <b>Cod Pacific</b>                                         | 0.1                       | 0.04                      |                                                            |                                |                                                         |
| <b>Tuna yellowfin</b>                                      | 0.09                      | 0.01                      |                                                            |                                |                                                         |
| <b>Mean DHA and EPA Omega-3 Fatty Acids g/3 ounce fish</b> | 0.4531                    | 0.2733                    |                                                            |                                |                                                         |
| <b>Calculations total Omega-3 FA g to fish g</b>           |                           |                           | 0.7264                                                     | 85.02                          | 117.043                                                 |

352 ¶ Data on omega-3 fatty acid content of varieties of fish came from the National Institutes of  
 353 Health Office of Dietary Supplements (USA)

354  
 355  
 356

357 **Supplementary Table 3. Calculations of kcal/day from g/day of animal and plant foods¶**

| <b>Foods</b>                     | <b>Food sub-categories</b> | <b>kcal/serving</b> | <b>g/serving</b> | <b>kcal/g</b> |
|----------------------------------|----------------------------|---------------------|------------------|---------------|
| <b>Milk (2% fat)</b>             |                            | 122                 | 244              | 0.5           |
| <b>Fish</b>                      |                            | 218                 | 170              | 1.28          |
| <b>Eggs</b>                      |                            | 72                  | 50               | 1.44          |
| <b>Poultry</b>                   |                            | 187                 | 85               | 2.91          |
| <b>Red meat</b>                  |                            | 247                 | 85               | 2.91          |
| <b>Processed meat</b>            |                            |                     |                  |               |
|                                  | <b>Salami</b>              | 222                 | 59               | 3.76          |
|                                  | <b>Pastrami</b>            | 104                 | 71               | 1.46          |
|                                  | <b>Ring baloney</b>        | 86                  | 28               | 3.07          |
|                                  | <b>Pepperoni</b>           | 94                  | 100              | 0.94          |
| <b>Average processed meat</b>    |                            | 126.5               | 64.5             | 1.96          |
| <b>Fruits</b>                    |                            | 97                  | 162              | 0.60          |
| <b>Vegetables</b>                |                            | 59                  | 91               | 0.65          |
| <b>Legumes</b>                   |                            | 249                 | 179              | 1.39          |
| <b>Nuts</b>                      |                            | 172                 | 28               | 6.14          |
| <b>Seeds</b>                     |                            |                     |                  |               |
|                                  | <b>Flax seeds</b>          | 55                  | 10               | 5.5           |
|                                  | <b>Chia seeds</b>          | 58                  | 12               | 4.83          |
|                                  | <b>Fennel seeds</b>        | 34.5                | 10               | 3.45          |
|                                  | <b>Hemp seeds</b>          | 55.3                | 10               | 5.53          |
| <b>Average of seeds</b>          |                            | 50.7                | 10.5             | 4.83          |
| <b>Average of nuts and seeds</b> |                            | 111.4               | 19.25            | 5.78          |
| <b>Corn</b>                      |                            | 99                  | 103              | 0.96          |
| <b>Potatoes</b>                  |                            | 161                 | 173              | 0.93          |
| <b>Sweet potatoes</b>            |                            | 115                 | 151              | 0.76          |
| <b>Rice</b>                      |                            | 205                 | 158              | 1.3           |
| <b>Whole grains</b>              |                            | 120                 | 52               | 2.31          |

358 ¶ Source: NutritionIX app

359

360

361

362 **Supplementary Table 4. Pearson correlations between BMI formula risk factors from**  
 363 **Table 1**

|                                           | Red meat | Fish   | Milk   | Poultry | Eggs   | Alcohol | Sugary beverages | Corn   | Potatoes | SFA    | PUFA   |
|-------------------------------------------|----------|--------|--------|---------|--------|---------|------------------|--------|----------|--------|--------|
| Correlations between BMI risk factors (r) |          |        |        |         |        |         |                  |        |          |        |        |
| Processed meat KC/d                       | 0.647    | 0.286  | 0.756  | 0.662   | 0.569  | 0.576   | -0.108           | -0.050 | 0.159    | 0.624  | 0.699  |
| Red meat KC/d                             | 1.000    | 0.118  | 0.676  | 0.664   | 0.784  | 0.466   | 0.046            | -0.143 | 0.123    | 0.704  | 0.694  |
| Fish KC/d                                 | 0.118    | 1.000  | 0.109  | 0.163   | 0.393  | 0.294   | -0.163           | -0.018 | -0.058   | 0.038  | 0.163  |
| Milk KC/d                                 | 0.676    | 0.109  | 1.000  | 0.673   | 0.525  | 0.385   | 0.072            | -0.107 | 0.202    | 0.766  | 0.680  |
| Poultry KC/d                              | 0.664    | 0.163  | 0.673  | 1.000   | 0.628  | 0.351   | 0.142            | 0.011  | 0.102    | 0.701  | 0.837  |
| Eggs KC/d                                 | 0.784    | 0.393  | 0.525  | 0.628   | 1.000  | 0.341   | 0.021            | -0.099 | 0.030    | 0.595  | 0.631  |
| Alcohol KC/d                              | 0.466    | 0.294  | 0.385  | 0.351   | 0.341  | 1.000   | -0.090           | -0.107 | -0.011   | 0.287  | 0.379  |
| Sugary beverages KC/d                     | 0.046    | -0.163 | 0.072  | 0.142   | 0.021  | -0.090  | 1.000            | 0.419  | -0.025   | 0.045  | 0.113  |
| Corn KC/d                                 | -0.143   | -0.018 | -0.107 | 0.011   | -0.099 | -0.107  | 0.419            | 1.000  | 0.158    | -0.133 | -0.034 |
| Potatoes KC/d                             | 0.123    | -0.058 | 0.202  | 0.102   | 0.030  | -0.011  | -0.025           | 0.158  | 1.000    | 0.211  | 0.086  |
| SFA KC/d                                  | 0.704    | 0.038  | 0.766  | 0.701   | 0.595  | 0.287   | 0.045            | -0.133 | 0.211    | 1.000  | 0.635  |
| PUFAs KC/d                                | 0.694    | 0.163  | 0.680  | 0.837   | 0.631  | 0.379   | 0.113            | -0.034 | 0.086    | 0.635  | 1.000  |
| TFA KC/d                                  | 0.187    | -0.008 | 0.428  | 0.446   | 0.203  | 0.152   | 0.198            | 0.269  | -0.091   | 0.233  | 0.433  |
| Fruits KC/d                               | 0.371    | 0.098  | 0.490  | 0.606   | 0.366  | 0.058   | 0.198            | 0.102  | 0.243    | 0.470  | 0.589  |
| Vegetables KC/d                           | 0.382    | 0.272  | 0.349  | 0.345   | 0.513  | 0.191   | -0.167           | -0.203 | -0.047   | 0.224  | 0.385  |
| Nuts and seeds KC/d                       | 0.386    | 0.072  | 0.579  | 0.504   | 0.333  | 0.232   | -0.146           | -0.112 | 0.187    | 0.471  | 0.527  |
| Whole grains KC/d                         | -0.112   | 0.091  | -0.254 | -0.023  | -0.077 | 0.066   | 0.204            | 0.428  | -0.058   | -0.165 | -0.063 |
| Legumes KC/d                              | -0.404   | 0.061  | -0.194 | -0.220  | -0.416 | 0.140   | 0.197            | 0.269  | 0.019    | -0.389 | -0.145 |
| Rice KC/d                                 | -0.351   | -0.070 | -0.565 | -0.389  | -0.271 | -0.129  | -0.148           | -0.250 | -0.377   | -0.378 | -0.368 |
| Sweet potatoes KC/d                       | 0.005    | -0.074 | -0.395 | -0.240  | 0.049  | -0.063  | -0.218           | -0.028 | 0.239    | -0.130 | -0.234 |
| Physical activity METs                    | -0.068   | -0.163 | -0.430 | -0.396  | -0.114 | 0.105   | -0.103           | 0.028  | 0.022    | -0.309 | -0.431 |
| Child underweight                         | -0.736   | -0.189 | -0.403 | -0.618  | -0.803 | -0.131  | -0.065           | -0.083 | -0.215   | -0.584 | -0.622 |

|                                           | TFA    | Fruits | Vegetables | Nuts-seeds | Whole grains | Legumes | Rice   | Sweet potatoes | Physical activity | Child underweight | sex m/f |
|-------------------------------------------|--------|--------|------------|------------|--------------|---------|--------|----------------|-------------------|-------------------|---------|
| Correlations between BMI risk factors (r) |        |        |            |            |              |         |        |                |                   |                   |         |
| Processed meat KC/d                       | 0.463  | 0.379  | 0.290      | 0.504      | -0.023       | -0.197  | -0.391 | -0.194         | -0.212            | -0.411            | -0.086  |
| Red meat KC/d                             | 0.187  | 0.371  | 0.382      | 0.386      | -0.112       | -0.404  | -0.351 | 0.005          | -0.068            | -0.736            | -0.230  |
| Fish KC/d                                 | -0.008 | 0.098  | 0.272      | 0.072      | 0.091        | 0.061   | -0.070 | -0.074         | -0.163            | -0.189            | -0.023  |
| Milk KC/d                                 | 0.428  | 0.490  | 0.349      | 0.579      | -0.254       | -0.194  | -0.565 | -0.395         | -0.430            | -0.403            | -0.018  |
| Poultry KC/d                              | 0.446  | 0.606  | 0.345      | 0.504      | -0.023       | -0.220  | -0.389 | -0.240         | -0.396            | -0.618            | 0.000   |
| Eggs KC/d                                 | 0.203  | 0.366  | 0.513      | 0.333      | -0.077       | -0.416  | -0.271 | 0.049          | -0.114            | -0.803            | 0.000   |
| Alcohol KC/d                              | 0.152  | 0.058  | 0.191      | 0.232      | 0.066        | 0.140   | -0.129 | -0.063         | 0.105             | -0.131            | -0.432  |
| Sugary beverages KC/d                     | 0.198  | 0.198  | -0.167     | -0.146     | 0.204        | 0.197   | -0.148 | -0.218         | -0.103            | -0.065            | -0.311  |
| Corn KC/d                                 | 0.269  | 0.102  | -0.203     | -0.112     | 0.428        | 0.269   | -0.250 | -0.028         | 0.028             | -0.083            | 0.000   |
| Potatoes KC/d                             | -0.091 | 0.243  | -0.047     | 0.187      | -0.058       | 0.019   | -0.377 | 0.239          | 0.022             | -0.215            | 0.000   |
| SFA KC/d                                  | 0.233  | 0.470  | 0.224      | 0.471      | -0.165       | -0.389  | -0.378 | -0.130         | -0.309            | -0.584            | 0.007   |
| PUFAs KC/d                                | 0.433  | 0.589  | 0.385      | 0.527      | -0.063       | -0.145  | -0.368 | -0.234         | -0.431            | -0.622            | -0.013  |
| TFA KC/d                                  | 1.000  | 0.387  | 0.284      | 0.312      | 0.087        | 0.044   | -0.261 | -0.322         | -0.412            | -0.121            | 0.096   |
| Fruits KC/d                               | 0.387  | 1.000  | 0.386      | 0.579      | 0.012        | -0.028  | -0.319 | -0.096         | -0.391            | -0.493            | 0.116   |
| Vegetables KC/d                           | 0.284  | 0.386  | 1.000      | 0.547      | -0.349       | -0.157  | -0.230 | -0.095         | -0.208            | -0.453            | -0.066  |
| Nuts and seeds KC/d                       | 0.312  | 0.579  | 0.547      | 1.000      | -0.211       | -0.023  | -0.352 | -0.074         | -0.302            | -0.293            | -0.030  |
| Whole grains KC/d                         | 0.087  | 0.012  | -0.349     | -0.211     | 1.000        | 0.100   | 0.548  | -0.039         | 0.268             | 0.089             | -0.064  |
| Legumes KC/d                              | 0.044  | -0.028 | -0.157     | -0.023     | 0.100        | 1.000   | -0.050 | -0.054         | -0.068            | 0.506             | -0.142  |
| Rice KC/d                                 | -0.261 | -0.319 | -0.230     | -0.352     | 0.548        | -0.050  | 1.000  | 0.070          | 0.386             | 0.374             | 0.000   |
| Sweet potatoes KC/d                       | -0.322 | -0.096 | -0.095     | -0.074     | -0.039       | -0.054  | 0.070  | 1.000          | 0.327             | -0.167            | 0.000   |
| Physical activity                         | -0.412 | -0.391 | -0.208     | -0.302     | 0.268        | -0.068  | 0.386  | 0.327          | 1.000             | 0.135             | -0.257  |
| Child underweight                         | -0.121 | -0.493 | -0.453     | -0.293     | 0.089        | 0.506   | 0.374  | -0.167         | 0.135             | 1.000             | -0.017  |

364 **Red: Fruits, vegetables, and nuts and seeds correlated positively with BMI increasing foods**  
 365 **Blue: Fruits, vegetables, and nuts and seeds correlated positively with themselves**  
 366 **Green: Fruits, vegetables, and nuts and seeds correlated negatively with BMI decreasing foods**  
 367  
 368

369 **Supplementary Table 5. Derivation of the BMI formula**

370

|     |   | Column A                                                   |   | Column B |   | Column C                   |   | Column D                        |   | Column E                                         |   | Column F                                     |
|-----|---|------------------------------------------------------------|---|----------|---|----------------------------|---|---------------------------------|---|--------------------------------------------------|---|----------------------------------------------|
| Row |   | BMI risk factors                                           |   | Mean     |   | BMI v<br>RF R <sup>2</sup> |   | Adjust<br>for<br>fatty<br>acids |   | Multiple<br>regression<br>parameter<br>estimates |   | Column B<br>Column C<br>Column D<br>Column F |
| 1   | + | Processed meat                                             | * | 5.334    | * | 0.3527                     | * | 1                               | * | 0.0034                                           | = | 0.0064                                       |
| 2   | + | Red meat                                                   | * | 50.27    | * | 0.4304                     | * | 1                               | * | 0.0034                                           | = | 0.0736                                       |
| 3   | + | Fish                                                       | * | 9.985    | * | 0.0104                     | * | 1                               | * | 0.0034                                           | = | 0.0004                                       |
| 4   | + | Milk                                                       | * | 25.04    | * | 0.4573                     | * | 1                               | * | 0.0034                                           | = | 0.0389                                       |
| 5   | + | Poultry available                                          | * | 44.32    | * | 0.6539                     | * | 1                               | * | 0.0034                                           | = | 0.0985                                       |
| 6   | + | Eggs available                                             | * | 19.36    | * | 0.4672                     | * | 1                               | * | 0.0034                                           | = | 0.0308                                       |
| 7   | + | Alcohol                                                    | * | 81.03    | * | 0.0213                     | * | 1                               | * | 0.0034                                           | = | 0.0059                                       |
| 8   | + | Sugary beverages                                           | * | 298.36   | * | 0.0170                     | * | 1                               | * | 0.0034                                           | = | 0.0173                                       |
| 9   | + | Corn available                                             | * | 34.72    | * | 0.0058                     | * | 1                               | * | 0.0034                                           | = | 0.0007                                       |
| 10  | + | Potatoes available                                         | * | 84.04    | * | 0.0439                     | * | 1                               | * | 0.0034                                           | = | 0.0125                                       |
| 11  | + | SFA                                                        | * | 190.58   | * | 0.4946                     | * | 0.46                            | * | 0.0034                                           | = | 0.1474                                       |
| 12  | + | PUFAs                                                      | * | 81.096   | * | 0.5330                     | * | 0.46                            | * | 0.0034                                           | = | 0.0676                                       |
| 13  | + | TFA                                                        | * | 13.23    | * | 0.2256                     | * | 0.46                            | * | 0.0034                                           | = | 0.0047                                       |
| 14  | + | Fruits                                                     | * | 40.21    | * | 0.3798                     | * | 1                               | * | 0.0034                                           | = | 0.0519                                       |
| 15  | + | Vegetables                                                 | * | 79.76    | * | 0.2612                     | * | 1                               | * | 0.0034                                           | = | 0.0708                                       |
| 16  | + | Nuts and seeds                                             | * | 8.414    | * | 0.2248                     | * | 1                               | * | 0.0034                                           | = | 0.0064                                       |
| 17  | - | Whole grains                                               | * | 55.65    | * | 0.0412                     | * | 1                               | * | 0.0034                                           | = | 0.0078                                       |
| 18  | - | Legumes                                                    | * | 51.74    | * | 0.1471                     | * | 1                               | * | 0.0034                                           | = | 0.0259                                       |
| 19  | - | Rice available                                             | * | 141.86   | * | 0.3104                     | * | 1                               | * | 0.0034                                           | = | 0.1497                                       |
| 20  | - | Sweet potatoes available                                   | * | 22.76    | * | 0.0218                     | * | 1                               | * | 0.0034                                           | = | 0.0017                                       |
| 21  | - | Physical activity METs                                     |   |          |   |                            |   |                                 | * | 0.12949                                          | = | 0.1295                                       |
| 23  | - | Child underweight by >2SD                                  |   |          |   |                            |   |                                 | * | 0.35420                                          |   | 0.3542                                       |
| 22  | + | Sex male 1 and female 2                                    |   |          |   |                            |   |                                 | * | 0.10455                                          | = | 0.1046                                       |
| 24  |   | Sum of parameter estimates                                 |   |          |   |                            |   |                                 |   |                                                  |   | 1.4071                                       |
| 25  |   | R <sup>2</sup> of BMI formula                              |   |          |   |                            |   |                                 |   |                                                  |   | 0.8585                                       |
| 26  |   | R <sup>2</sup> of BMI formula / Sum of parameter estimates |   |          |   |                            |   |                                 |   |                                                  |   | 0.6101                                       |
| 27  |   | F1-F23 * F27 * 100 to convert to percent weights           |   |          |   |                            |   |                                 |   |                                                  |   | 61.01                                        |

371

372

373 **Supplementary Table 5. Derivation of the BMI formula continued**

| Row |   | Column G                                          |   | Column H                    |   | Column I                                                                         |   | Column J                                  |
|-----|---|---------------------------------------------------|---|-----------------------------|---|----------------------------------------------------------------------------------|---|-------------------------------------------|
|     |   | BMI risk factors                                  |   | Un-adjusted Percent weights |   | BMI risk factors with fruits, vegetables, and nuts and seeds with negative signs |   | Percent weights (J1- J23) * 0.94299 (J27) |
| 1   | + | Processed meat                                    | * | 0.3903                      | + | Processed meat                                                                   | * | 0.3680                                    |
| 2   | + | Red meat                                          | * | 4.4882                      | + | Red meat                                                                         | * | 4.2324                                    |
| 3   | + | Fish                                              | * | 0.0216                      | + | Fish                                                                             | * | 0.0204                                    |
| 4   | + | Milk                                              | * | 2.3753                      | + | Milk                                                                             | * | 2.2399                                    |
| 5   | + | Poultry available                                 | * | 6.0115                      | + | Poultry available                                                                | * | 5.6688                                    |
| 6   | + | Eggs available                                    | * | 1.8764                      | + | Eggs available                                                                   | * | 1.7694                                    |
| 7   | + | Alcohol                                           | * | 0.3585                      | + | Alcohol                                                                          | * | 0.3381                                    |
| 8   | + | Sugary beverages                                  | * | 1.0532                      | + | Sugary beverages                                                                 | * | 0.9932                                    |
| 9   | + | Corn available                                    | * | 0.0416                      | + | Corn available                                                                   | * | 0.0392                                    |
| 10  | + | Potatoes available                                | * | 0.7654                      | + | Potatoes available                                                               | * | 0.7218                                    |
| 11  | + | SFA                                               | * | 8.9947                      | + | SFA                                                                              | * | 8.4819                                    |
| 12  | + | PUFAs                                             | * | 4.1245                      | + | PUFAs                                                                            | * | 3.8893                                    |
| 13  | + | TFA                                               | * | 0.2848                      | + | TFA                                                                              | * | 0.2685                                    |
| 14  | + | Fruits                                            | * | 3.1683                      | - | Fruits                                                                           | * | 2.9877                                    |
| 15  | + | Vegetables                                        | * | 4.3224                      | - | Vegetables                                                                       | * | 4.0760                                    |
| 16  | + | Nuts and seeds                                    | * | 0.3923                      | - | Nuts and seeds                                                                   | * | 0.3700                                    |
| 17  | - | Whole grains                                      | * | 0.4751                      | - | Whole grains                                                                     | * | 0.4480                                    |
| 18  | - | Legumes                                           | * | 1.5789                      | - | Legumes                                                                          | * | 1.4889                                    |
| 19  | - | Rice available                                    | * | 9.1354                      | - | Rice available                                                                   | * | 8.6146                                    |
| 20  | - | Sweet potatoes available                          | * | 0.1029                      | - | Sweet potatoes available                                                         | * | 0.0970                                    |
| 21  | - | Physical activity METs                            | * | 7.9004                      | - | Physical activity METs                                                           | * | 7.4500                                    |
| 22  | - | Child underweight by >2SD                         | * | 21.6105                     | - | Child underweight by >2SD                                                        | * | 20.3784                                   |
| 23  | + | Sex male 1 and female 2                           | * | 6.3788                      | + | Sex male 1 and female 2                                                          | * | 6.0151                                    |
| 24  |   | Sum of parameter estimates                        |   | 85.8512                     |   | Sum of parameter estimates                                                       |   | 80.9568                                   |
| 25  |   | r of unadjusted BMI formula                       |   | 0.9266                      |   | r of adjusted BMI formula                                                        |   | 0.8998                                    |
| 26  |   | R <sup>2</sup> of unadjusted BMI formula          |   | 0.8585                      |   | R <sup>2</sup> of adjusted BMI formula                                           |   | 0.8096                                    |
| 27  |   |                                                   |   |                             |   | Sum percent weights (J24) / unadjusted sum percent weights (H24)                 |   | 0.4299                                    |
| 28  |   | H26 * 100 to convert to total percent weights=H24 |   | 85.8512                     |   | J26 * 100 to convert to percent weights=J24                                      |   | 80.9560                                   |

374

375

376 **Supplementary Table 6. BMI trend versus risk factor trends formula derivation (all**  
 377 **variables standardized)**

|     |   | Column A                                       |   | Column B |   | Column C                             |   | Column D                   |   | Column E                                |   | Column F                                           |
|-----|---|------------------------------------------------|---|----------|---|--------------------------------------|---|----------------------------|---|-----------------------------------------|---|----------------------------------------------------|
| Row |   | BMI trend and risk factor trends (change/year) |   | Mean     |   | BMI trend v RF trends R <sup>2</sup> |   | Adjustment for fatty acids |   | Multiple regression parameter estimates |   | Column B *<br>Column C *<br>Column D *<br>Column E |
|     |   | BMI kg/M <sup>2</sup> trend                    |   | 0.07603  |   |                                      |   |                            |   |                                         |   |                                                    |
| 1   | - | Processed meat KC/d trend                      | * | 0.0513   | * | 0.0001                               | * | 1.00                       | * | 1.1427                                  | = | 0.0000                                             |
| 2   | + | Red meat KC/d trend                            | * | 0.5556   | * | 0.1682                               | * | 1.00                       | * | 1.1427                                  | = | 0.1068                                             |
| 3   | - | Fish KC/d trend                                | * | 0.2244   | * | 0.0251                               | * | 1.00                       | * | 1.1427                                  | = | 0.0064                                             |
| 4   | + | Milk KC/d trend                                | * | 0.1901   | * | 0.0425                               | * | 1.00                       | * | 1.1427                                  | = | 0.0092                                             |
| 5   | + | Poultry KC/d trend                             | * | 1.1457   | * | 0.1768                               | * | 1.00                       | * | 1.1427                                  | = | 0.2315                                             |
| 6   | + | Eggs KC/d trend                                | * | 0.2996   | * | 0.2340                               | * | 1.00                       | * | 1.1427                                  | = | 0.0801                                             |
| 7   | + | Alcohol KC/d trend                             | * | 0.0307   | * | 0.0833                               | * | 1.00                       | * | 1.1427                                  | = | 0.0029                                             |
| 8   | + | Sugary beverages KC/d trend                    | * | 0.2890   | * | 0.0156                               | * | 1.00                       | * | 1.1427                                  | = | 0.0051                                             |
| 9   | - | Corn KC/d trend                                | * | 0.0284   | * | 0.0198                               | * | 1.00                       | * | 1.1427                                  | = | 0.0006                                             |
| 10  | + | Potatoes KC/d trend                            | * | 0.2461   | * | 0.0740                               | * | 1.00                       | * | 1.1427                                  | = | 0.0208                                             |
| 11  | - | SFA KC/d trend                                 | * | 0.2101   | * | 0.0025                               | * | 0.46                       | * | 1.1427                                  | = | 0.0003                                             |
| 12  | + | PUFA KC/d trend                                | * | 0.9963   | * | 0.0820                               | * | 0.46                       | * | 1.1427                                  | = | 0.0429                                             |
| 13  | + | TFA trend                                      | * | 0.2096   | * | 0.0044                               | * | 0.46                       | * | 1.1427                                  | = | 0.0005                                             |
| 14  | + | Fruits KC/d trend                              | * | 0.6234   | * | 0.2317                               | * | 1.00                       | * | 1.1427                                  | = | 0.1651                                             |
| 15  | + | Vegetables KC/d trend                          | * | 1.3992   | * | 0.1570                               | * | 1.00                       | * | 1.1427                                  | = | 0.2511                                             |
| 16  | + | Nuts and seeds KC/d trend                      | * | 0.2762   | * | 0.0150                               | * | 1.00                       | * | 1.1427                                  | = | 0.0047                                             |
| 17  | + | Whole grains KC/d trend                        | * | 0.1729   | * | 0.0108                               | * | 1.00                       | * | 1.1427                                  | = | 0.0021                                             |
| 18  | - | Legumes KC/d trend                             | * | 0.3696   | * | 0.0886                               | * | 1.00                       | * | 1.1427                                  | = | 0.0374                                             |
| 19  | + | Rice KC/d trend                                | * | 0.7869   | * | 0.0886                               | * | 1.00                       | * | 1.1427                                  | = | 0.1389                                             |
| 20  | + | Sweet potatoes KC/d trend                      | * | 0.4603   | * | 0.0886                               | * | 1.00                       | * | 1.1427                                  | = | 0.1311                                             |
| 21  | + | Physical activity METs trend                   | * |          |   |                                      |   |                            | * | 0.20825                                 | = | 0.20825                                            |
| 22  | - | Child underweight >2SD trend                   | * |          |   |                                      |   |                            | * | 0.03926                                 | = | 0.03926                                            |
| 23  |   |                                                |   |          |   |                                      |   |                            |   |                                         |   | 1.48519                                            |

378  
379

380 **Supplementary Table 6. BMI trend versus risk factor trends formula derivation continued**

| Row |   | Column G                                  |   | Column H                                                 |   | Column I                         |   | Column J                                                                       |
|-----|---|-------------------------------------------|---|----------------------------------------------------------|---|----------------------------------|---|--------------------------------------------------------------------------------|
|     |   | BMI trend and risk factor trends          |   | Preliminary risk factor coefficients (Column F repeated) |   | BMI trend and risk factor trends |   | Column H: $H_{26} * (H_1 - H_{22}) = \text{BMI trend formula percent weights}$ |
|     | + | BMI kg/M <sup>2</sup> trend               |   | 0.0760                                                   | + | BMI kg/M <sup>2</sup> trend      |   | 0.0760                                                                         |
| 1   | - | Processed meat KC/d trend                 | * | 0.0000                                                   | - | Processed meat KC/d trend        | * | 0.00                                                                           |
| 2   | + | Red meat KC/d trend                       | * | 0.1068                                                   | + | Red meat KC/d trend              | * | 2.52                                                                           |
| 3   | - | Fish KC/d trend                           | * | 0.0064                                                   | - | Fish KC/d trend                  | * | 0.15                                                                           |
| 4   | + | Milk KC/d trend                           | * | 0.0092                                                   | + | Milk KC/d trend                  | * | 0.22                                                                           |
| 5   | + | Poultry KC/d trend                        | * | 0.2315                                                   | + | Poultry KC/d trend               | * | 5.46                                                                           |
| 6   | + | Eggs KC/d trend                           | * | 0.0801                                                   | + | Eggs KC/d trend                  | * | 1.89                                                                           |
| 7   | + | Alcohol KC/d trend                        | * | 0.0029                                                   | + | Alcohol KC/d trend               | * | 0.07                                                                           |
| 8   | + | Sugary beverages KC/d trend               | * | 0.0051                                                   | + | Sugary beverages KC/d trend      | * | 0.12                                                                           |
| 9   | - | Corn KC/d trend                           | * | 0.0006                                                   | - | Corn KC/d trend                  | * | 0.02                                                                           |
| 10  | + | Potatoes KC/d trend                       | * | 0.0208                                                   | + | Potatoes KC/d trend              | * | 0.49                                                                           |
| 11  | - | SFA KC/d trend                            | * | 0.0003                                                   | - | SFA KC/d trend                   | * | 0.01                                                                           |
| 12  | + | PUFA KC/d trend                           | * | 0.0429                                                   | + | PUFA KC/d trend                  | * | 1.01                                                                           |
| 13  | + | TFA trend                                 | * | 0.0005                                                   | + | TFA trend                        | * | 0.01                                                                           |
| 14  | + | Fruits KC/d trend                         | * | 0.1651                                                   | + | Fruits KC/d trend                | * | 3.89                                                                           |
| 15  | + | Vegetables KC/d trend                     | * | 0.2511                                                   | + | Vegetables KC/d trend            | * | 5.92                                                                           |
| 16  | + | Nuts and seeds KC/d trend                 | * | 0.0047                                                   | + | Nuts and seeds KC/d trend        | * | 0.11                                                                           |
| 17  | + | Whole grains KC/d trend                   | * | 0.0021                                                   | + | Whole grains KC/d trend          | * | 0.05                                                                           |
| 18  | - | Legumes KC/d trend                        | * | 0.0374                                                   | - | Legumes KC/d trend               | * | 0.88                                                                           |
| 19  | + | Rice KC/d trend                           | * | 0.1389                                                   | + | Rice KC/d trend                  | * | 3.28                                                                           |
| 20  | + | Sweet potatoes KC/d trend                 | * | 0.1311                                                   | + | Sweet potatoes KC/d trend        | * | 3.09                                                                           |
| 21  | + | Physical activity METs trend              | * | 0.20825                                                  | + | Physical activity METs trend     | * | 4.91                                                                           |
| 22  | - | Child underweight >2SD trend              | * | 0.03926                                                  | - | Child underweight >2SD trend     | * | 0.93                                                                           |
| 23  |   | Sum                                       |   | 1.48519                                                  |   | Total percent weights            |   | 35.02                                                                          |
| 24  |   | BMI trend formula R <sup>2</sup>          |   | 0.35020                                                  |   |                                  |   |                                                                                |
| 25  |   | BMI trend formula R <sup>2</sup> /sum     |   | 0.23579                                                  |   |                                  |   |                                                                                |
| 26  |   | H <sub>25</sub> * 100 for percent weights |   | 23.57947                                                 |   |                                  |   |                                                                                |

381  
382  
383

## 384 **Appendix 1. Bradford Hill causality criteria based** 385 **assessment methodology for BMI formula detailed**

386 The Bradford Hill causality criteria, enumerated by the English occupational physician and  
387 epidemiologist Sir Austin Bradford Hill, are the gold standard assessment tools to test causality  
388 of risk factors related to health outcomes.<sup>3</sup> The relevant causality criteria included #1 strength, #2  
389 experimentation, #3 consistency, #4 dose-response (biological gradient), #5 temporality, #6  
390 analogy, #7 plausibility, (8) specificity, and #9 coherence.

391  
392 A literature search revealed no published methodological precedents for statistically modeling  
393 and validating the relationship between mean cohort BMIs of worldwide countries and  
394 subnational regions/provinces/states and their corresponding dietary and other risk factors. In  
395 considering many candidate methodologies involving univariate and multiple regression  
396 analysis, we sought a methodology with good performance with as many Bradford Hill causality  
397 criteria as possible. Of the candidate statistical modeling strategies, the methodology for deriving  
398 the BMI multiple regression formula that will be detailed in Appendix 2 functioned best. So,  
399 after deriving the BMI formula, we formulated the following Bradford Hill causality criteria  
400 scoring methodology for this unprecedented purpose.

### 401 402 **Bradford Hill causal criteria testing methodology applied to current study**

403 The nine original Bradford Hill criteria were each scored as:

- 404 • “5” very strongly supporting causality,
- 405 • “4” strongly supporting causality,



- 406 • “3” moderately strongly supporting causality,
- 407 • “2” supporting causality,
- 408 • “1” weakly supporting causality, and
- 409 • “0” not supporting causality

410

411 The scoring for each Bradford Hill causal criterion was as follows:

- 412 1. Strength: The correlation coefficient,  $r$ , of the worldwide multiple regression derived  
413 BMI formula with BMI (dependent variable) and BMI risk factors (independent  
414 variables) assessed strength.

415 Scoring of strength:

416 5=BMI formula regressed with BMI  $r \geq 0.50$  and  $p < 0.0001$

417 4=BMI formula regressed with BMI  $0.50 > r \geq 0.40$  and  $p < 0.0001$

418 3=BMI formula regressed with BMI  $0.40 > r \geq 0.30$  and  $p < 0.0001$

419 2=BMI formula regressed with BMI  $0.30 > r \geq 0.20$  and  $p < 0.0001$

420 1=BMI formula regressed with BMI  $0.20 > r \geq 0.10$  and  $p < 0.0001$

421 0=BMI formula regressed with BMI  $r < 0.10$  or  $p \geq 0.0001$

422

- 423 2. Experiment: Dr. Hill thought that evidence drawn from experimentation, including in  
424 epidemiologic studies, may lead to the strongest support for causal inference.<sup>3</sup> We used  
425 the bootstrap method to test Hill’s “experiment” criterion. Random number generation of  
426 20 subgroups each with 100 cohorts (with replacements) derived 20 standardized BMI  
427 formulas to compare with the standardized worldwide BMI formula.

428 Scoring of experiment:

- 429 5=In all 20 bootstrap trials each with 100 random cohorts, RCT1-RCT20 of BMI  
430 formulas regressed with RCT1-RCT20 of BMIs, respectively:  $r \geq 0.50$  and  $p < 0.0001$   
431 4= In at least 15 out of 20 bootstrap trials each with 100 random cohorts, RCT1-RCT20  
432 of BMI formulas regressed with RCT1-RCT20 of BMIs, respectively:  $r \geq 0.50$  and  
433  $p < 0.0001$ .
- 434 3= In at least 15 out of 20 bootstrap trials each with 100 random cohorts, RCT1-RCT20  
435 of BMI formulas regressed with RCT1-RCT20 of BMIs, respectively:  $r \geq 0.40$  and  
436  $p < 0.0001$ .
- 437 2= In at least 10 out of 20 bootstrap trials each with 100 random cohorts, RCT1-RCT20  
438 of BMI formulas regressed with RCT1-RCT20 of BMIs, respectively:  $r \geq 0.30$  and  
439  $p < 0.0001$ .
- 440 1= In at least 5 out of 20 bootstrap trials each with 100 random cohorts, RCT1-RCT20 of  
441 BMI formulas regressed with RCT1-RCT20 of BMIs, respectively:  $r \geq 0.30$  and  
442  $p < 0.0001$ .
- 443 0=None of the above.
- 444 3. Consistency: For the purposes of this study, consistency between BMI and BMI formula  
445 output was determined by comparing the mean BMI and the mean BMI formula output in  
446 each of the following 37 subgroups:
- 447 A. We divided the world's population by quartiles of socio-demographic index (SDI)—  
448 see Supplementary Table 1 for definition of SDI.
- 449 B. A variable, “continents,” allowed for analyses of the cohorts from countries from  
450 each of the six inhabited continents.

- 451 C. The four countries (UK, USA, Mexico, and Japan) with subnational data on BMI and  
452 the risk factors were grouped together to compare the BMI formula output with the  
453 overall mean BMI in those four countries.
- 454 D. Based on the total kcal/day of the 13 foods that increased BMI (six animal foods,  
455 sugary beverages, alcohol, corn, potatoes, SFA, PUFA, and TFA), a combination  
456 variable was constructed and the world's population divided into quartiles from the  
457 highest to lowest total kcal/day of BMI increasing foods.
- 458 E. Similarly to D above, based on the total kcal/day of all seven foods that decreased  
459 BMI (fruits, vegetables, nuts and seeds, whole grains, legumes, rice, and sweet  
460 potatoes), we divided the world's population into quartiles from the highest to lowest  
461 in BMI decreasing foods (kcal/day).
- 462 F. Based on physical activity (METs/week), we divided the world's population into  
463 quartiles from the highest to the lowest.
- 464 G. We evaluated dose response by dividing the BMI formula output into quartiles from  
465 the highest to lowest.
- 466 H. The four countries with subnational data were individually evaluated.
- 467 I. The first four of the 20 random number generated database subgroups were included  
468 in the consistency analysis.
- 469 J. Male and female cohorts were individually assessed.
- 470 K. We assessed dose-response with the BMI formula outputs after the BMI formula was  
471 harmonized with the mean and SD of worldwide mean BMI. BMI formula outputs  
472 were divided into quartiles.
- 473

474 For each of the 37 subgroups, the absolute differences between the means of BMI and the  
475 BMI formula output were totaled (e.g., continent Africa BMI formula output – mean BMI  
476 for Africa, etc.).

477  
478 Scoring of consistency for mean cohort BMI compared with BMI formula output for each  
479 of the 37 subgroups:

480 5=The mean of the absolute differences between mean BMI and BMI formula output was  
481  $\leq 0.30 \text{ kg/M}^2$ .

482 4=The mean of the absolute differences between mean BMI and BMI formula output was  
483  $\leq 0.40 \text{ kg/M}^2$ .

484 3=The mean of the absolute differences between mean BMI and BMI formula output was  
485  $\leq 0.50 \text{ kg/M}^2$ .

486 2=The mean of the absolute differences between mean BMI and BMI formula output was  
487  $\leq 0.60 \text{ kg/M}^2$ .

488 1=The mean of the absolute differences between mean BMI and BMI formula output was  
489  $\leq 1.0 \text{ kg/M}^2$ .

490 0=The mean of the absolute differences between mean BMI and BMI formula output was  
491  $> 1.0 \text{ kg/M}^2$ .

492  
493 4. Dose-response (biological gradient): Dr. Hill thought that a clear dose-response effect on  
494 the incidence of disease with exposure to a single risk factor was the clearest evidence of  
495 a causal relationship. In this analysis levels of a multivariable regression derived BMI

496 formula outputs in quartiles were related to mean BMIs in those quartiles (Table 3.  
497 subgroups #34-#37).

498 As with consistency, scoring of dose-response was based on this mean absolute  
499 difference of BMI and BMI formula output when the BMI formula output was divided  
500 into quartiles:

501 5= The BMI formula output versus mean BMI absolute differences from each of the four  
502 quartiles averages  $\leq 0.30 \text{ kg/M}^2$ .

503 4= The BMI formula output versus mean BMI absolute differences from each of the four  
504 quartiles averages  $\leq 0.40 \text{ kg/M}^2$ .

505 3= The BMI formula output versus mean BMI absolute differences from each of the four  
506 quartiles averages  $\leq 0.50 \text{ kg/M}^2$ .

507 2= The BMI formula output versus mean BMI absolute differences from each of the four  
508 quartiles averages  $\leq 0.60 \text{ kg/M}^2$ .

509 1= The BMI formula output versus mean BMI absolute differences from each of the four  
510 quartiles averages  $\leq 1.0 \text{ BMI units}$ .

511 0= The BMI formula output versus mean BMI absolute differences from each of the four  
512 quartiles averages  $> 1.0 \text{ kg/M}^2$ .

513 5. Temporality: Dr. Hill said, "Temporality refers to the necessity that the cause precedes  
514 the effect in time."<sup>3</sup> Dr. Hill was an occupational physician before the current availability  
515 in nutritional epidemiology of data on trends over 28 years of 20 components of  
516 worldwide diets along with the global BMI trend. Consequently, now it is fair to test  
517 temporality by deriving a standardized multiple regression formula with BMI trend,  
518 measured by the slope of the least squared regression line (LSRL) over 1990-2017, as the

519 dependent variable. The independent variables consisted of the LSRL trends over 1990-  
520 2017 of the same dietary components, physical activity, and childhood underweight as in  
521 the original BMI formula—but not sex. The signs of the risk factors in the BMI trend  
522 formula were determined as follows:

- 523 a. If the sign of the risk factor in Table 4 (BMI basic trend statistics) was “+” and  
524 the r was “+”, then the sign in the BMI trend formula was +.
- 525 b. If the sign of the risk factor in Table 4 was “-“ and the r was “-,” then the sign in  
526 the BMI trend formula was “+”. If the risk factor mean value was trending down  
527 and the correlation coefficient of the risk factor with the BMI trend was negative,  
528 this risk factor trend would be in alignment with an up-trending BMI.
- 529 c. If the sign of the risk factor in Table 4 was “-“ and the r was “+,” then the sign in  
530 the BMI trend formula was “-”.
- 531 d. If the sign of the risk factor in Table 4 was “+“ and the r was “-,” then the sign in  
532 the BMI trend formula was “-”.

533 Supplementary Table 6 shows the derivation of the BMI trend formula with standardized  
534 BMI trend (dependent variable) versus standardized risk factor trends (independent  
535 variables). As with the derivation of the BMI formula (Supplementary Table 5), the  
536 coefficients of the risk factors in the formula were adjusted to equate to the trend percent  
537 weights.

538 Scoring of temporality: The multiple regression derived BMI trend formula output versus  
539 the BMI trend r (correlation coefficient) determined the score:

540  $5=r \geq 0.50$  and  $p < 0.0001$ .

541  $4=0.50 > r \geq 0.40$  and  $p < 0.0001$ .

542 3= $0.40 > r \geq 0.30$  and  $p < 0.0001$ .

543 2= $0.30 > r \geq 0.20$  and  $p < 0.0001$ .

544 1= $0.20 > r \geq 0.10$  and  $p < 0.0001$ .

545 0= $r < 0.10$  or  $p \geq 0.0001$

546

547 6. Analogy: High BMI was among the four metabolic risk factors that were strongly associated  
548 with cardiovascular diseases, cancers, and other non-communicable diseases. The other  
549 major metabolic risk factors for non-communicable diseases were high fasting plasma  
550 glucose (FPG), low density lipoprotein cholesterol (LDL-C), and high systolic blood pressure  
551 (SBP).

552

553 We tested analogy by the strength of the correlations of BMI with FPG, BMI with LDL-C,  
554 and BMI with SBP in univariate analysis.

555 Scoring of analogy:

556 5=BMI correlated with all three other metabolic risk factors showed  $r \geq 0.500$ ,  $p < 0.0001$   
557 for all three.

558 4= BMI correlated with the three other metabolic risk factors showed  $r \geq 0.500$ ,  $p < 0.0001$   
559 for two of the three.

560 3= BMI correlated with the three other metabolic risk factors showed  $r \geq 0.400$ ,  $p < 0.0001$   
561 for two of the three.

562 2= BMI correlated with the three other metabolic risk factors showed  $r \geq 0.300$ ,  $p < 0.0001$   
563 for two of the three.

- 564 1=BMI correlated with the three other metabolic risk factors showed  $r \geq 0.200$ ,  $p < 0.0001$   
565 for two of the three.  
566 0= None of the above.
- 567 7. Plausibility: To test plausibility that the BMI formula could accurately predict mean BMI  
568 of cohorts, we looked to find if any of our findings were at variance with the  
569 preponderance of studies published. We searched the medical literature particularly for  
570 systematic reviews of the relationships of foods and other variables with BMI.  
571 Scoring of plausibility:  
572 5=None of the BMI formula risk factor percent weight coefficients was at variance with  
573 the preponderance of the medical literature about risk factors for high BMI.  
574 4= One of the BMI formula risk factor percent weight coefficients was at variance with  
575 the preponderance of the medical literature about risk factors for high BMI.  
576 3= Two of the BMI formula risk factor percent weight coefficients were at variance with  
577 the preponderance of the medical literature about risk factors for high BMI.  
578 2=Three of the BMI formula risk factor percent weight coefficients were at variance with  
579 the preponderance of the medical literature about risk factors for high BMI.  
580 1=Four of the BMI formula risk factor percent weight coefficients were at variance with  
581 the preponderance of the medical literature about risk factors for high BMI.  
582 0= Five or more of the BMI formula risk factor percent weight coefficients were at  
583 variance with the preponderance of the medical literature about risk factors for high BMI.
- 584 8. Specificity: Either the BMI formula derived is unique or not. Scoring of specificity:  
585 5=The BMI formula derived is unique and can model no other metabolic risk factor, other  
586 risk factor, or health outcome.



587 0= The BMI formula derived is not unique and can model at least one other metabolic risk  
588 factor, other risk factor, or health outcome.

589 9. Coherence: According to Dr. Hill, "...cause and effect interpretation of our data should not  
590 seriously conflict with the generally known facts of the natural history and biology of the  
591 disease."<sup>3</sup> In this analysis of BMI associated with BMI formula estimates, coherence was the  
592 numerical total score of the above eight relevant causality criteria each on a 0-5 scale. The  
593 maximum score was 40.

594 Scoring of coherence:

595 5=Score on the first eight Bradford Hill causation criteria=35-40.

596 4=Score on the first eight Bradford Hill causation criteria=30-34.

597 3=Score on the first eight Bradford Hill causation criteria=25-29.

598 2=Score on the first eight Bradford Hill causation criteria=20-24.

599 1=Score on the first eight Bradford Hill causation criteria=15-24.

600 0=Score on the first eight Bradford Hill causation criteria<15.

601

602

603

## 604 **Appendix 2. The derivation of the BMI formula**

### 605 **Population attributable fraction (PAF) derivation methodology by WHO and IHME**

606 Because of wide variations in definitions of risk factors and health outcomes in reports of risk  
607 factor-health outcome correlations, the World Health Organization in 2002 published a new  
608 framework, termed comparative risk assessment (CRA), for quantifying deaths and burden of  
609 disease caused by risk factors.<sup>15</sup> Goals were to increase the rigor of population health estimates  
610 and to improve the compatibility of the estimates of different groups of investigators studying  
611 different populations. CRA can be divided into six key steps:<sup>16</sup>

- 612
- 613 1. Inclusion of risk–outcome pairs in the analysis;
- 614 2. estimation from literature reviews of relative risk as a function of exposure;
- 615 3. estimation from literature reviews of exposure levels and distributions;
- 616 4. determination from literature reviews of the counterfactual level of exposure, the  
617 level of exposure with minimum risk called the theoretical minimum risk exposure  
618 level (TMREL);
- 619 5. computation of population attributable fractions (PAFs) and attributable burden; and
- 620 6. estimation from literature reviews of mediation of different risk factors through other  
621 risk factors

622

623 Originally, most PAFs were calculated for single risk factors related to single health outcomes  
624 (e.g., cigarette smoking and lung cancer). This methodology has now evolved to encompass 550  
625 risk factor-health outcome pairs in the latest risk factor article published by the IHME.<sup>16</sup>  
626 Additionally, multiple risk factors with PAFs for the same health outcome have been reported.

627 Data inputs for CRAs have depended on systematic literature reviews rather than GBD data on  
628 risk factors and health outcomes.

629  
630 For the purposes of risk factor-health outcome pair analysis, high BMI has been considered a risk  
631 factor for cardiovascular outcomes, cancer outcomes, etc., but not itself a health outcome for  
632 modeling with CRA. The methodology in this paper is offered as an alternative to CRA to model  
633 PFAs for the risk factors for BMI. The case will be made that PAFs can be derived directly from  
634 IHME GBD data. For validation, the BMI formula derived were tested with the nine Bradford  
635 Hill causality criteria (Appendix 2).

636  
637 **Population attributable fraction (PAF) derivation methodology for this analysis**

638 Supplementary Table 5 shows the BMI multiple regression formula derivation with mean cohort  
639 BMI (dependent variable) versus

- 640 1. a 20 dietary risk factor combination variable,
- 641 2. physical activity,
- 642 3. child underweight, and
- 643 4. sex (independent variables).

644 To maximize the functionality of the BMI formula when tested with the nine Bradford Hill  
645 causality criteria, all 20 dietary variables underwent the following four empirically derived  
646 adjustments:

- 647 1. multiplied times their mean kcal/day values (Column B),
- 648 2. multiplied times their  $R^2$  values in univariate correlation with BMI (Column C),

- 649 3. SFA, PUFA, and TFA multiplied times 0.46, an adjustment for fatty acids extracted (i.e.,  
650 oils and solid fats) versus coming from within dietary foods (Column D) In determining  
651 the portion of SFA, PUFA, and TFA added in addition to these fatty acids in the animal  
652 and plant foods, we used an adjustment factor (fatty acids \* 0.46), adapted from the  
653 website “Our World in Data.”<sup>17</sup> This adjustment factor differentiated the fatty acids in  
654 individual foods (54% of the total) from the added fatty acids (46% of the total), and  
655 4. the parameter estimates from the BMI versus risk factors multiple regression analysis  
656 (Column F).

657

658 To derive the PAFs of each of the risk factors in the BMI formula, we used the following steps:

- 659 1. Assign the signs of the risk factors in Column A according to the signs of the risk factor  
660 correlations with BMI, including leaving positive signs for fruits, vegetables, and nuts  
661 and seeds.
- 662 2. Calculate the adjusted dietary risk factor coefficients (Column F (F1-F23) = Column B  
663 (B1-B23) \* Column C (C1-C23 \* Column D (D1=D23) \* Column E (E1-E23)).
- 664 3. Copy Column F coefficients (F1-F23) to Column H (H1-H23) for a further adjustment.
- 665 4. Multiply the copied coefficients in Column H (H1-H23) times the  $R^2$  value of the entire  
666 BMI formula correlated with BMI (F26=H26=0.8585) and divide the result by the sum of  
667 the 23 adjusted coefficients from step 3=1.4071 (F24) to get the BMI formula adjustment  
668 factor (F26=0.6101).
- 669 5. Multiply (F26=0.6101) \* 100 to give a multiplier (F27=61.01) to derive PAFs for the  
670 coefficients in Column H (H1-H23).

671 6. Multiply (F27=61.01) times the coefficients in Column H to get the risk factor PAFs (H1-  
672 H23) and the not multicollinearity adjusted BMI formula total percent weight  
673 (H24=85.85%).

674 Note that the above BMI formula contains the multicollinearities of fruits, vegetables, and  
675 nuts and seeds (i.e., fruits, vegetables, and nuts and seeds correlate positively with 10 BMI  
676 increasing foods and correlate negatively with the four other plant foods). Consequently, we  
677 need to adjust the BMI formula to account for these multicollinearities by the following:

- 678 1. Add Column I and Column J that initially have the same BMI risk factors and  
679 coefficients as Column G and Column H.
- 680 2. Switch the signs on fruits, vegetables, and nuts and seeds from “+” in Column H to  
681 “-“ in Column J to adjust for the multicollinearities.
- 682 3. Run the multicollinearities adjusted BMI formula in step 2 on SAS software.
- 683 4. Check the r of the resulting multicollinearity adjusted BMI formula correlated with  
684 BMI (r=0.8998 (J25)).
- 685 5. Calculate the multicollinearity adjusted BMI formula  $R^2$  by squaring the r  
686 ( $R^2=0.8096$  (J26)).
- 687 6. Multiply J26=0.8096 times 100 to derive an adjusted total PAF for the final BMI  
688 formula (J28=80.96%).
- 689 7. Divide the final BMI formula total percent weight (J28=80.96%) by the sum of the  
690 non-collinearity adjusted BMI formula Column H coefficients (H24=85.85) to derive  
691 a BMI formula coefficient multiplier (J27=0.9432) to account for the  
692 multicollinearities.

- 693           8. Multiply the Column J coefficients (J1-J23) by the multicollinearity adjusting BMI  
694           formula coefficient multiplier (J27=0.9432) to derive the final BMI formula  
695           coefficients (J1-J23) as PAFs, totaling the final BMI formula total percent weight  
696           (J24=80.96%).
- 697           9. Test the validity of the BMI formula with the nine Bradford Hill causality criteria  
698           (Appendix 1).

699

700

701

702

703

704 **Article Information**

705 **Corresponding Author:** David K. Cundiff, Independent researcher,

706 davidkcundiff@gmail.com

707• **Authors' contributions:** DKC acts as guarantor; conceived and designed the study, acquired  
708 and analysed the data, interpreted the study findings, drafted the manuscript, critically reviewed  
709 and edited the manuscript and tables, and approved the final version for publication.

710

711 CW designed software programs in R to format and population weight the data,  
712 aided with the SAS statistical analysis, critically reviewed the manuscript, and  
713 approved the final version for publication.

714

715• **Conflict of Interest Disclosures:** None reported. Both authors have completed the ICMJE  
716 uniform disclosure form at [www.icmje.org/coi\\_disclosure.pdf](http://www.icmje.org/coi_disclosure.pdf) and declare: no support from any  
717 organisation for the submitted work; no financial relationships with any organisations that might  
718 have an interest in the submitted work in the previous three years; no other relationships or  
719 activities that could appear to have influenced the submitted work.

720

721• **Funding/Support:** This research received no specific grant from any funding agency in the  
722 public, commercial or not-for-profit sectors. The Bill and Melinda Gates Foundation funded the  
723 acquisition of the data for this analysis by the IHME. The data were provided to the authors as  
724 volunteer collaborators with IHME.

725•

726

727 **Role of the Funder/Sponsor:** While IHME GBD faculty and staff by virtue of the Bill and  
728 Melinda Gates Foundation grants provided the raw data for this analysis, they did not vet the  
729 analysis or sponsor the manuscript.

730  
731 **Additional Contributors:** Martin Sebera, from the Department of Kinesiology, Faculty of  
732 Sports Studies Masaryk University, Czech Republic, critiqued statistical aspects of the  
733 manuscript and provided useful input. Pavel Grasgruber, from Masaryk University, Czech  
734 Republic, provided suggestions after reviewing the manuscript. We thank Scott Glenn and Brent  
735 Bell from IHME who supplied us with the GBD risk factor exposure data for the risk factors and  
736 for BMI data.

737  
738 **Data sharing statement:** The raw, unformatted data used in this analysis is now out of date. The  
739 2019 GBD data on all the variables in this analysis may be obtained from the IHME by volunteer  
740 collaborating researchers. The formatted database, SAS codes and Excel spreadsheets on which  
741 this analysis is based are posted on the Mendeley data repository:

742 <https://data.mendeley.com/v1/datasets/publish-confirmation/g6b39zxck4/6>

743  
744 **STROBE checklist:** This report follows the STrengthening the Reporting of OBservational  
745 studies in Epidemiology (STROBE) guidelines for reporting global health estimates.<sup>34</sup>

746

747

748

749



## 750 References

- 751 1. Artificial Intelligence (AI). IBM Cloud Education. Accessed August 7, 2021,  
752 <https://www.ibm.com/cloud/learn/what-is-artificial-intelligence>
- 753 2. Ioannidis JPA. Implausible results in human nutrition research. *BMJ : British Medical*  
754 *Journal*. 2013;347doi:10.1136/bmj.f6698
- 755 3. Ioannidis JA. The challenge of reforming nutritional epidemiologic research. *JAMA*.  
756 2018;320(10):969-970. doi:10.1001/jama.2018.11025
- 757 4. Hill AB. THE ENVIRONMENT AND DISEASE: ASSOCIATION OR CAUSATION?  
758 *Proc R Soc Med*. 1965;58(5):295-300.
- 759 5. Global Burden of Disease Study 2017 (GBD 2017) Data Input Sources Tool. Institute of  
760 Health Metrics and Evaluation. Updated 2019. Accessed August 10, 2019,  
761 <http://ghdx.healthdata.org/gbd-2017/data-input-sources>
- 762 6. GBD 2017 Risk Factor Collaborators. Global, regional, and national comparative risk  
763 assessment of 84 behavioural, environmental and occupational, and metabolic risks or clusters of  
764 risks for 195 countries and territories, 1990–2017: a systematic analysis for the Global Burden of  
765 Disease Study 2017: Table of risk factor definitions. *The Lancet*. 2018;392(10159):1923-94.
- 766 7. PROTOCOL FOR THE GLOBAL BURDEN OF DISEASES, INJURIES, AND RISK  
767 FACTORS STUDY (GBD) Version 3.0; Issue 26. Institute for Health Metrics and Evaluation.  
768 Updated February 2018. Accessed August 2, 2019,  
769 [http://www.healthdata.org/sites/default/files/files/Projects/GBD/GBD\\_Protocol.pdf](http://www.healthdata.org/sites/default/files/files/Projects/GBD/GBD_Protocol.pdf)
- 770 8. Naghavi M, Abajobir AA, Abbafati C, et al. Global, regional, and national age-sex  
771 specific mortality for 264 causes of death, 1980–2016: a systematic analysis for the Global  
772 Burden of Disease Study 2016. *The Lancet*. 2017;390 (10100):1151-1210.
- 773 9. Flaxman AD, Lee YY, Vos T, et al. *An Integrative Metaregression Framework for*  
774 *Descriptive Epidemiology*. University of Washington Press; 2015.  
775 <http://www.guilles.website/wp-content/uploads/2017/11/Metaregression-AFlaxman.pdf>
- 776 10. GBD 2017 Risk Factor Collaborators. Global, regional, and national comparative risk  
777 assessment of 84 behavioural, environmental and occupational, and metabolic risks or clusters of  
778 risks for 195 countries and territories, 1990–2017: a systematic analysis for the Global Burden of  
779 Disease Study 2017. . *The Lancet*. 2018;392(10159):1923-94.
- 780 11. Call for Collaborators. . Institute for Health Metrics and Evaluation at the University of  
781 Washington. Updated 2019. Accessed April 25, 2019, [http://www.healthdata.org/gbd/call-for-](http://www.healthdata.org/gbd/call-for-collaborators)  
782 [collaborators](http://www.healthdata.org/gbd/call-for-collaborators)
- 783 12. Omega 3 Fatty Acids: Fact Sheet for Health Professionals (The Office of Dietary  
784 Supplements) (2018).
- 785 13. Nutritionix Track App. Syndigo LLC Updated 2019. Accessed April 25, 2019,  
786 <https://www.nutritionix.com/>
- 787 14. POTATO PROCESSING AND USES. International Potato Center. Updated 2020.  
788 Accessed May 28, 2020, <https://cipotato.org/potato/potato-processing-uses/>
- 789 15. Murray C, Lopez A, Rodgers A, et al. The World Health Report 2002: Reducing Risks,  
790 Promoting Healthy Life. World Health Organization.  
791 [https://apps.who.int/iris/bitstream/handle/10665/42510/WHR\\_2002.pdf](https://apps.who.int/iris/bitstream/handle/10665/42510/WHR_2002.pdf)
- 792 16. Murray CJL, Aravkin AY, Zheng P, et al. Global burden of 87 risk factors in 204  
793 countries and territories, 1990–2019: a systematic analysis for the Global Burden of Disease  
794 Study 2019. *The Lancet*. 2020;396(10258):1223-1249. doi:10.1016/S0140-6736(20)30752-2

- 795 17. Ritchie H, Roser M. Diet Compositions. *Our World in Data*. 2017;
- 796 18. Bloom JOJ. Bootstrap confidence intervals (Class 24, 18.05). MIT. Accessed July 25,
- 797 2021, [https://ocw.mit.edu/courses/mathematics/18-05-introduction-to-probability-and-statistics-](https://ocw.mit.edu/courses/mathematics/18-05-introduction-to-probability-and-statistics-spring-2014/readings/MIT18_05S14_Reading24.pdf)
- 798 [spring-2014/readings/MIT18\\_05S14\\_Reading24.pdf](https://ocw.mit.edu/courses/mathematics/18-05-introduction-to-probability-and-statistics-spring-2014/readings/MIT18_05S14_Reading24.pdf)
- 799 19. Ruotsalainen H, Kyngäs H, Tammelin T, Kääriäinen M. Systematic review of physical
- 800 activity and exercise interventions on body mass indices, subsequent physical activity and
- 801 psychological symptoms in overweight and obese adolescents. *Journal of Advanced Nursing*.
- 802 2015;71(11):2461-2477. doi:10.1111/jan.12696
- 803 20. Te Morenga L, Mallard S, Mann J. Dietary sugars and body weight: systematic review
- 804 and meta-analyses of randomised controlled trials and cohort studies. *BMJ* 2013;346:e7492.
- 805 doi:10.1136/bmj.e7492
- 806 21. Traversy G, Chaput J-P. Alcohol Consumption and Obesity: An Update. *Curr Obes Rep*.
- 807 2015;4(1):122-130. doi:10.1007/s13679-014-0129-4
- 808 22. Turner-McGrievy G, Mandes T, Crimarco A. A plant-based diet for overweight and
- 809 obesity prevention and treatment. *J Geriatr Cardiol*. 2017;14(5):369-374.
- 810 doi:10.11909/j.issn.1671-5411.2017.05.002
- 811 23. Darmon N, Drewnowski A. Contribution of food prices and diet cost to socioeconomic
- 812 disparities in diet quality and health: a systematic review and analysis. *Nutrition reviews*.
- 813 2015;73(10):643-660. doi:10.1093/nutrit/nuv027
- 814 24. United States Department of Agriculture FY 2019 BUDGET SUMMARY (US Office of
- 815 Budget and Program Analysis ) (2019).
- 816 25. Why is Government Subsidizing Junk Food?--22.6 percent of SNAP dollars are spent on
- 817 unhealthy food. Foundation for Economic Education. Updated February 25, 2017. Accessed
- 818 August 11, 2019, <https://fee.org/articles/why-is-government-subsidizing-junk-food/>
- 819 26. Wakamo B. We Subsidize the Wrong Kind of Agriculture. Inequality.org. Updated JUNE
- 820 21, 2018. <https://inequality.org/great-divide/subsidize-wrong-kind-agriculture/>
- 821 27. Fruits and Veggies Now Chock Full of Marketing Power (2017).
- 822 28. Ebbeling CB, Feldman HA, Klein GL, et al. Effects of a low carbohydrate diet on energy
- 823 expenditure during weight loss maintenance: randomized trial. *BMJ*. Nov 14 2018;363:k4583.
- 824 29. FORESIGHT--Tackling Obesities: Future Choices –Follow Up Actions. Government
- 825 Office for Science (UK). Updated 2019. Accessed August 5, 2019,
- 826 [https://assets.publishing.service.gov.uk/government/uploads/system/uploads/attachment\\_data/file](https://assets.publishing.service.gov.uk/government/uploads/system/uploads/attachment_data/file/295885/07-1526-obesity-action-plan.pdf)
- 827 [/295885/07-1526-obesity-action-plan.pdf](https://assets.publishing.service.gov.uk/government/uploads/system/uploads/attachment_data/file/295885/07-1526-obesity-action-plan.pdf)
- 828 30. Mărginean CO, Mărginean C, Meliț LE. New Insights Regarding Genetic Aspects of
- 829 Childhood Obesity: A Minireview. *Front Pediatr*. 2018;6:271-271.
- 830 doi:10.3389/fped.2018.00271
- 831 31. Castaner O, Goday A, Park Y-M, et al. The Gut Microbiome Profile in Obesity: A
- 832 Systematic Review. *Int J Endocrinol*. 2018;2018:4095789-4095789. doi:10.1155/2018/4095789
- 833 32. Monteiro CA, Moubarac J-C, Levy RB, Canella DS, Louzada MLdC, Cannon G.
- 834 Household availability of ultra-processed foods and obesity in nineteen European countries.
- 835 *Public Health Nutrition*. 2017;21(1):18-26. doi:10.1017/S1368980017001379
- 836 33. Monteiro CA, Cannon G, Levy RB, et al. Ultra-processed foods: what they are and how
- 837 to identify them. *Public Health Nutrition*. 2019;22(5):936-941.
- 838 doi:10.1017/S1368980018003762
- 839 34. Stevens GA, Alkema L, Black PRE, et al. Guidelines for Accurate and Transparent
- 840 Health Estimates Reporting: the GATHER statement. *The Lancet*. 2016;388(10062):e19-e23.

841
